# Supplementary material for: A forward genetics approach integrating genome‐wide association study and expression quantitative trait locus mapping to dissect leaf development in maize (Zea mays)
Source: PubMed Central journal article supplement — Plant J. 2021 Jul 8;107(4):1056–71. doi: 10.1111/tpj.15364 (PMC8519057; doi:10.1111/tpj.15364), 2021-07-08

# Zm00001d002064

Maize eFP Browser at bar.utoronto.ca

Zm00001d002064

Zm00001d002064

Winter *et al.*, PLoS One 2(8): e718  
 Stelplflug *et al.*, Plant Genome 9(1).  
 Hoopes *et al.* (2018) Plant J.

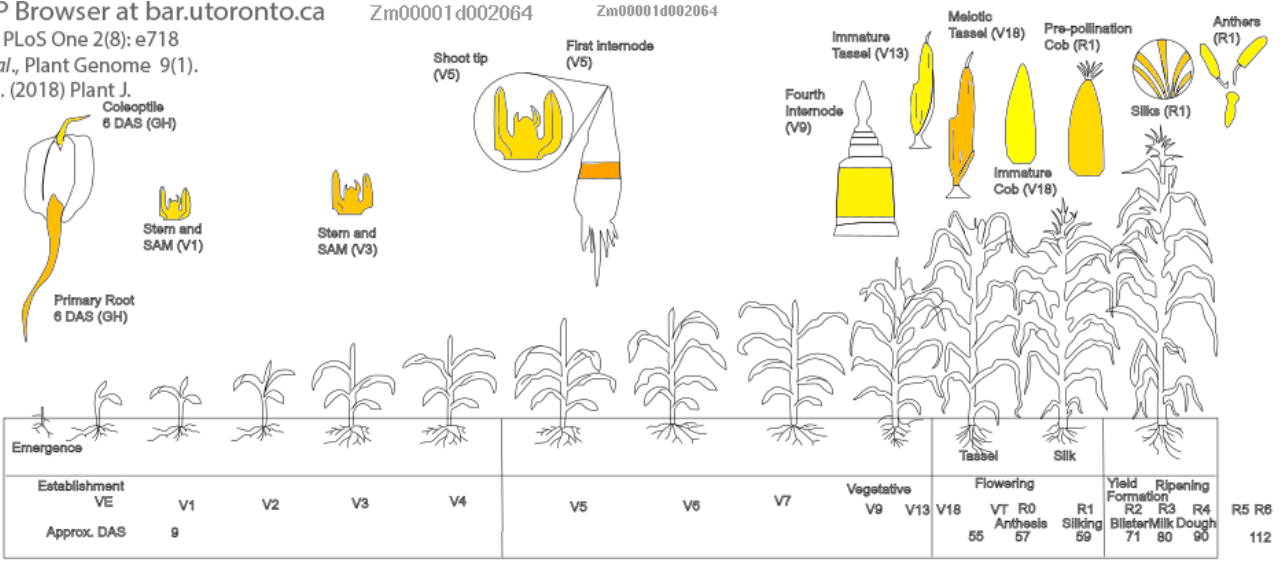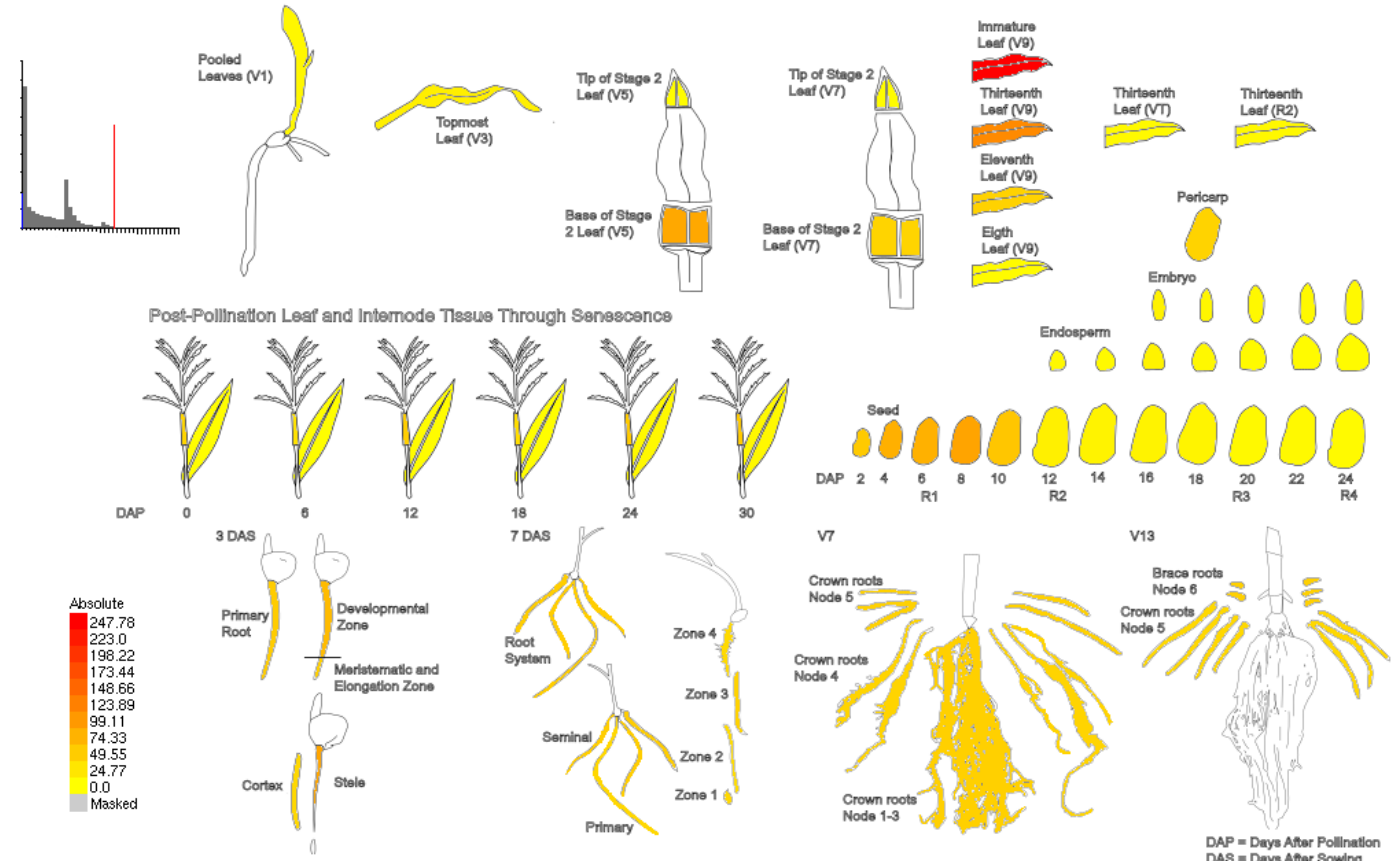

Adapters and low quality bases were removed using Cutadapt (v1.12) (Martin, 2011). All cleaned reads were aligned to the Z. mays inbred B73 AGPv4 genome assembly (Jiao *et al.*, 2017) with Bowtie2 (v2.2.3) (Langmead and Salzberg, 2012) and TopHat2 (v2.0.14) (Kim *et al.*, 2013). Fragments Per Kilobase of transcript per Million mapped reads (FPKM) gene expression values for Z. mays inbred B73 AGPv4 genes (Jiao *et al.*, 2017) was quantified with Cufflinks (v2.2.1) (Trapnell *et al.*, 2010).

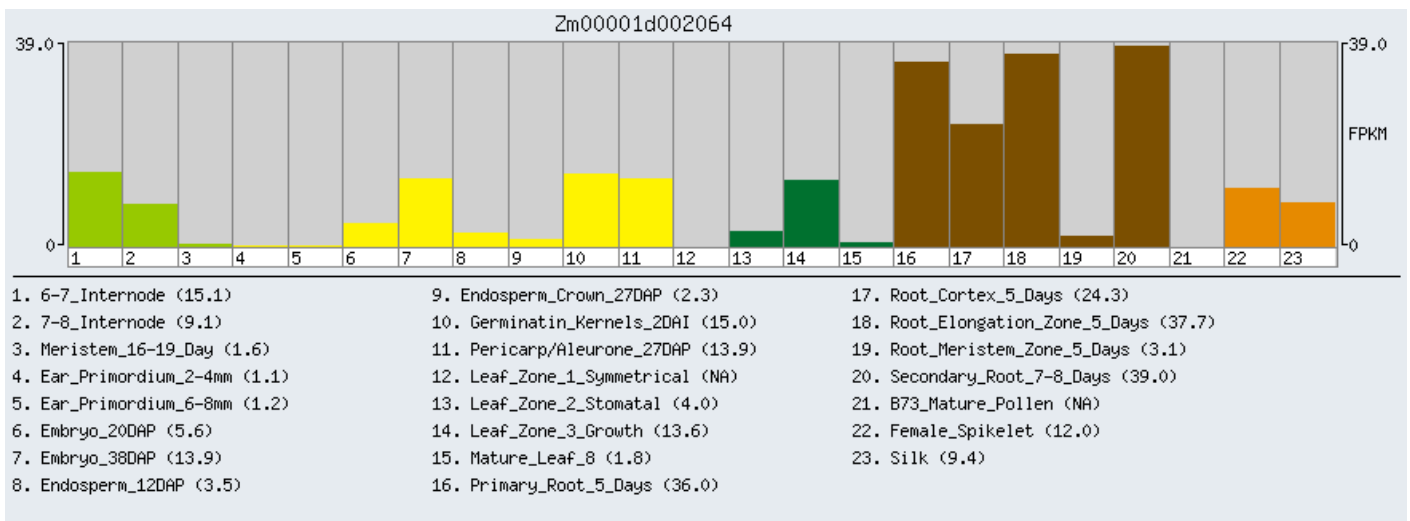

# Zm00001d004822

Maize eFP Browser at bar.utoronto.ca

Zm00001d004822

Zm00001d004822

Winter *et al.*, PLoS One 2(8): e718

Stelplflug *et al.*, Plant Genome 9(1).

Hoopes *et al.* (2018) Plant J.

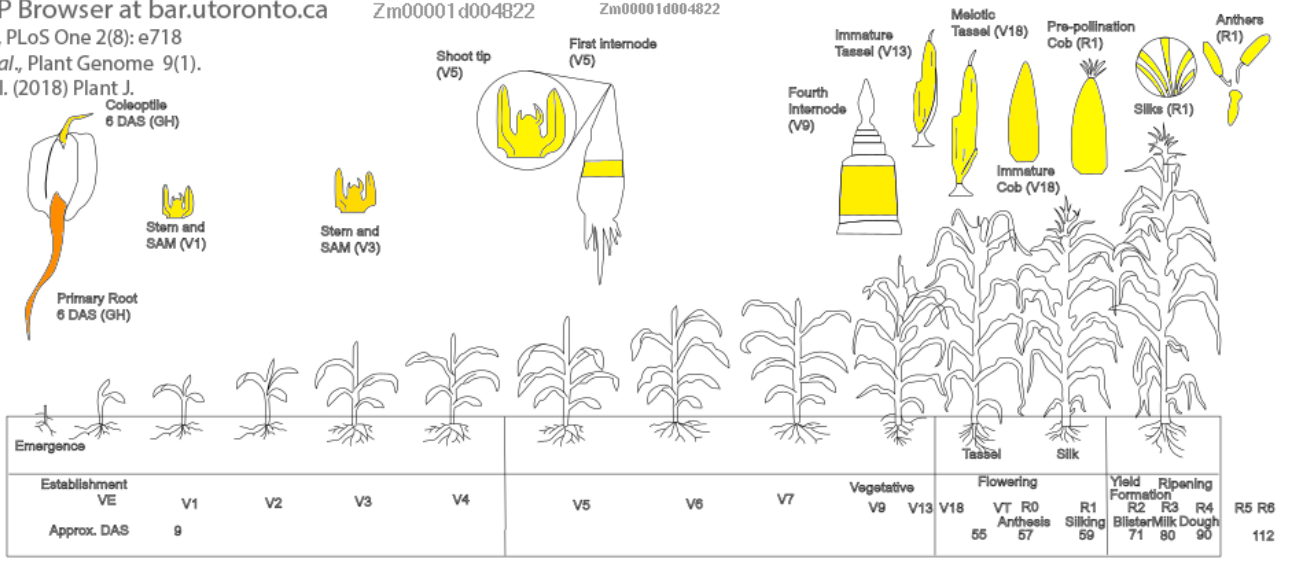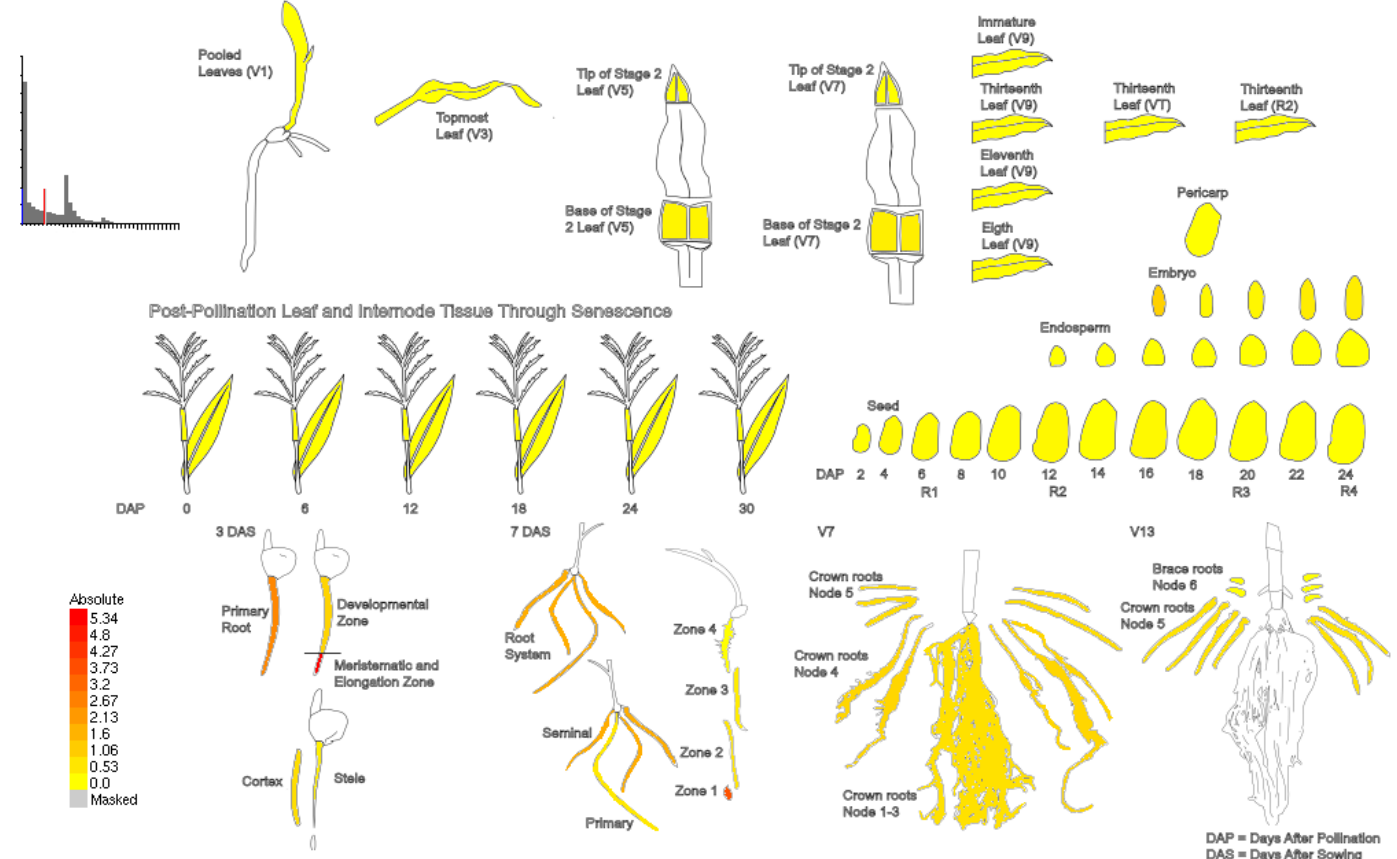

Adapters and low quality bases were removed using Cutadapt (v1.12) (Martin, 2011). All cleaned reads were aligned to the Z. mays inbred B73 AGPv4 genome assembly (Jiao *et al.*, 2017) with Bowtie2 (v2.2.3) (Langmead and Salzberg, 2012) and TopHat2 (v2.0.14) (Kim *et al.*, 2013). Fragments Per Kilobase of transcript per Million mapped reads (FPKM) gene expression values for Z. mays inbred B73 AGPv4 genes (Jiao *et al.*, 2017) was quantified with Cufflinks (v2.2.1) (Trapnell *et al.*, 2010).

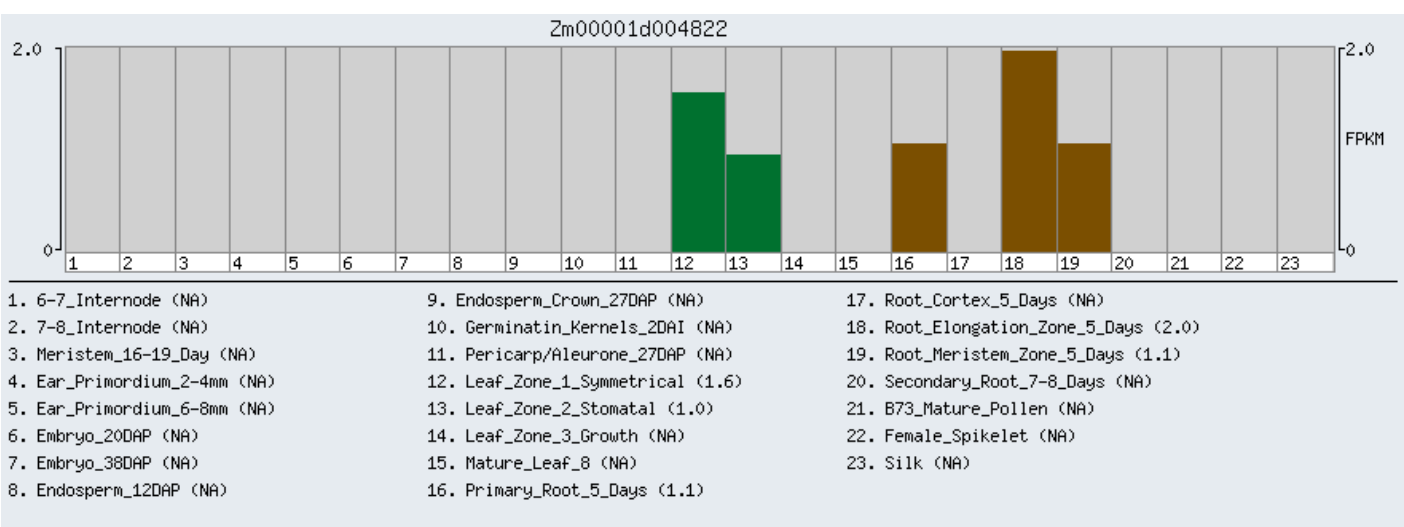









# Zm00001d011745

Maize eFP Browser at bar.utoronto.ca

Zm00001d011745

Zm00001d011745

Winter *et al.*, PLoS One 2(8): e718  
 Stelplflug *et al.*, Plant Genome 9(1).  
 Hoopes *et al.* (2018) Plant J.

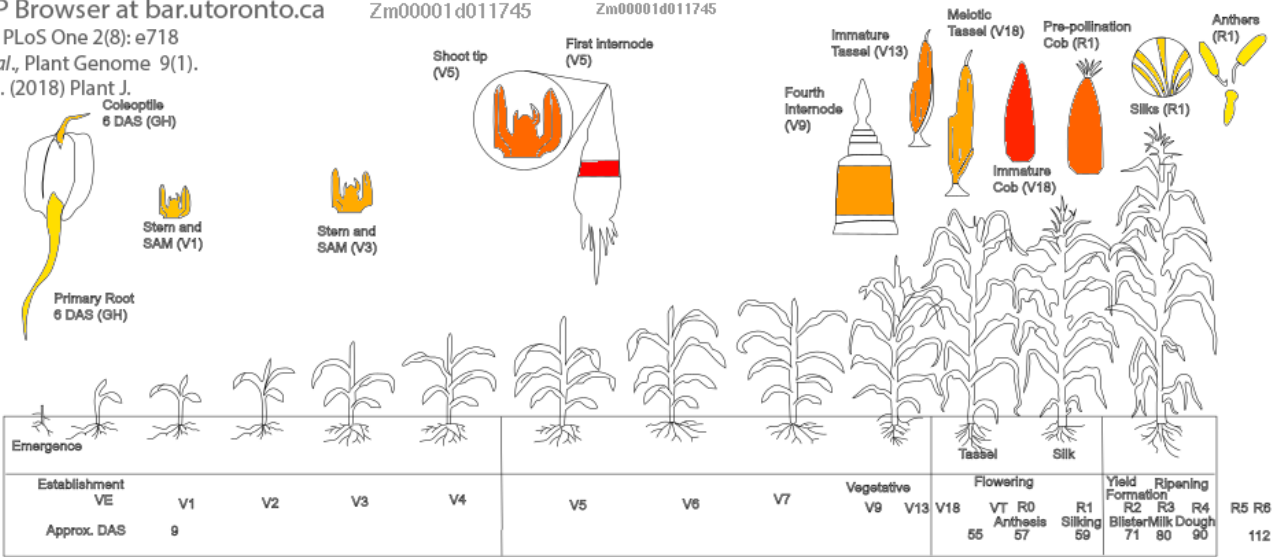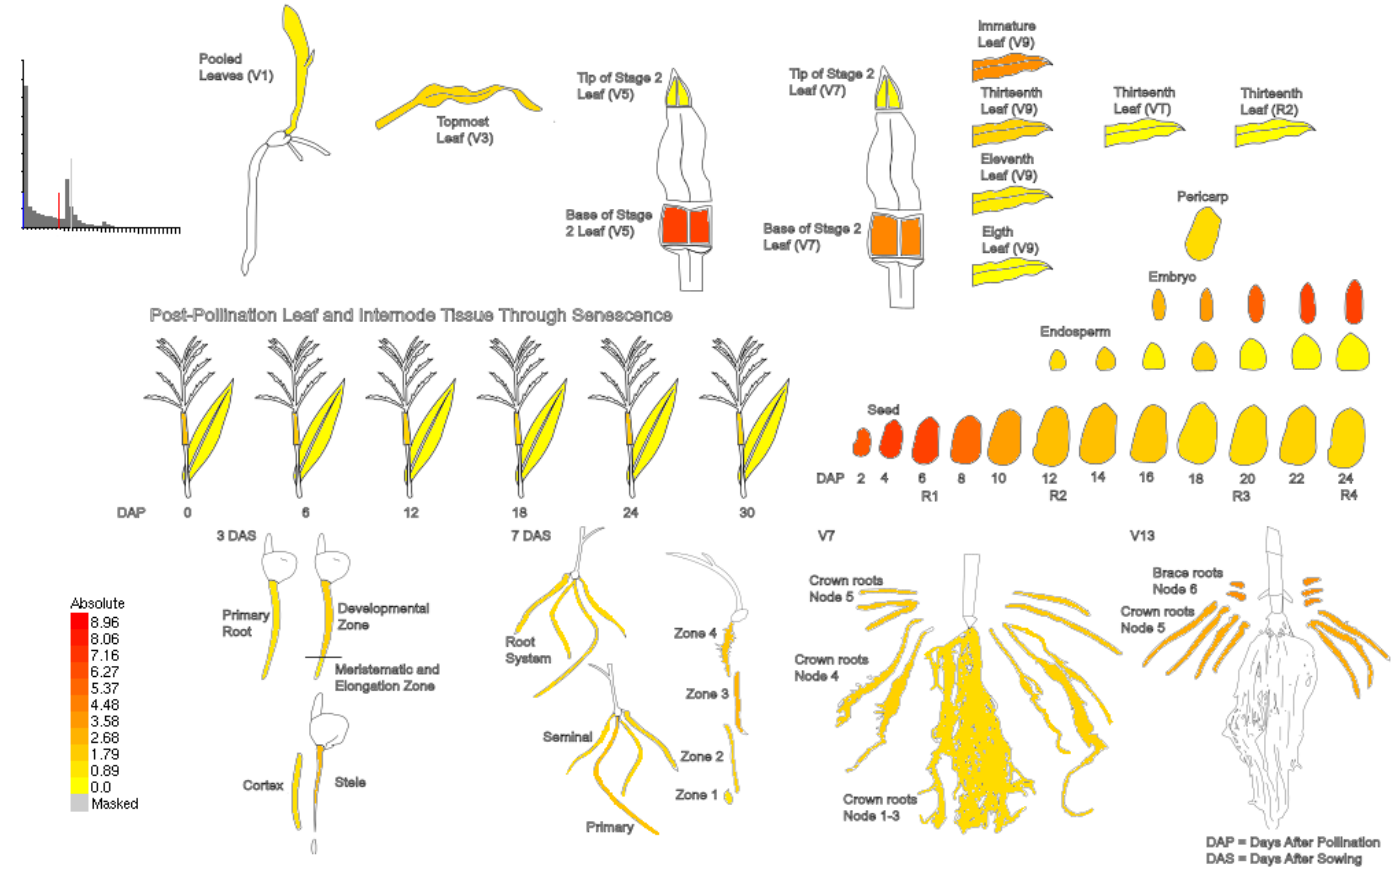

Adapters and low quality bases were removed using Cutadapt (v1.12) (Martin, 2011). All cleaned reads were aligned to the *Z. mays* inbred B73 AGPv4 genome assembly (Jiao *et al.*, 2017) with Bowtie2 (v2.2.3) (Langmead and Salzberg, 2012) and TopHat2 (v2.0.14) (Kim *et al.*, 2013). Fragments Per Kilobase of transcript per Million mapped reads (FPKM) gene expression values for *Z. mays* inbred B73 AGPv4 genes (Jiao *et al.*, 2017) was quantified with Cufflinks (v2.2.1) (Trapnell *et al.*, 2010).

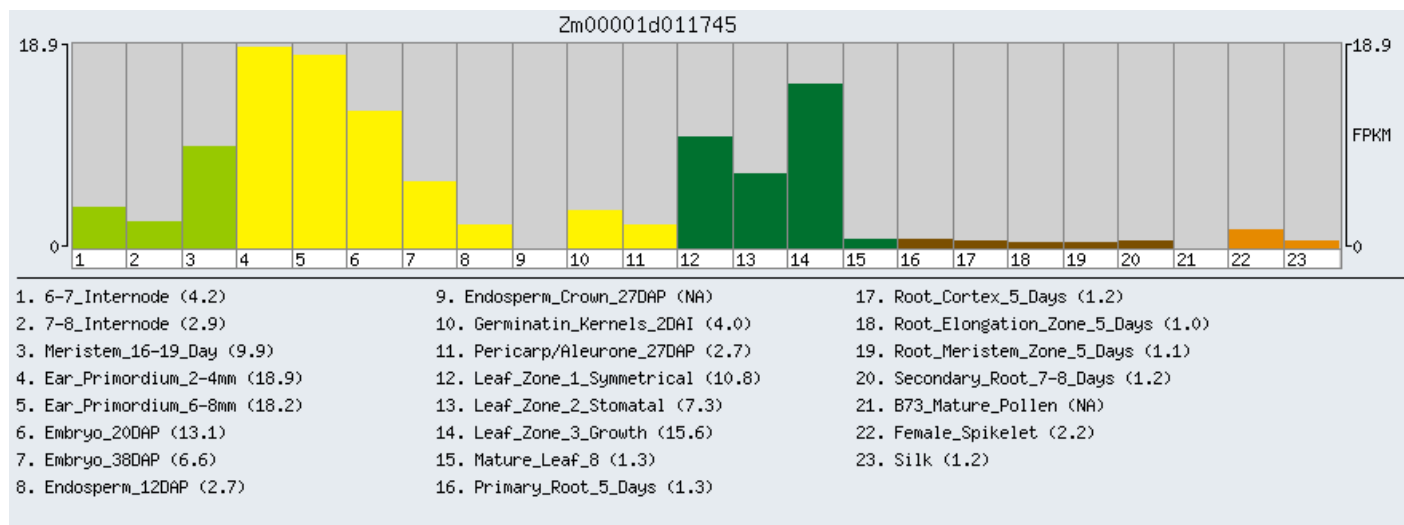

# Zm00001d011924

Maize eFP Browser at bar.utoronto.ca

Zm00001d011924

Zm00001d011924

Winter *et al.*, PLoS One 2(8): e718  
 Stelpflug *et al.*, Plant Genome 9(1).  
 Hoopes *et al.* (2018) Plant J.

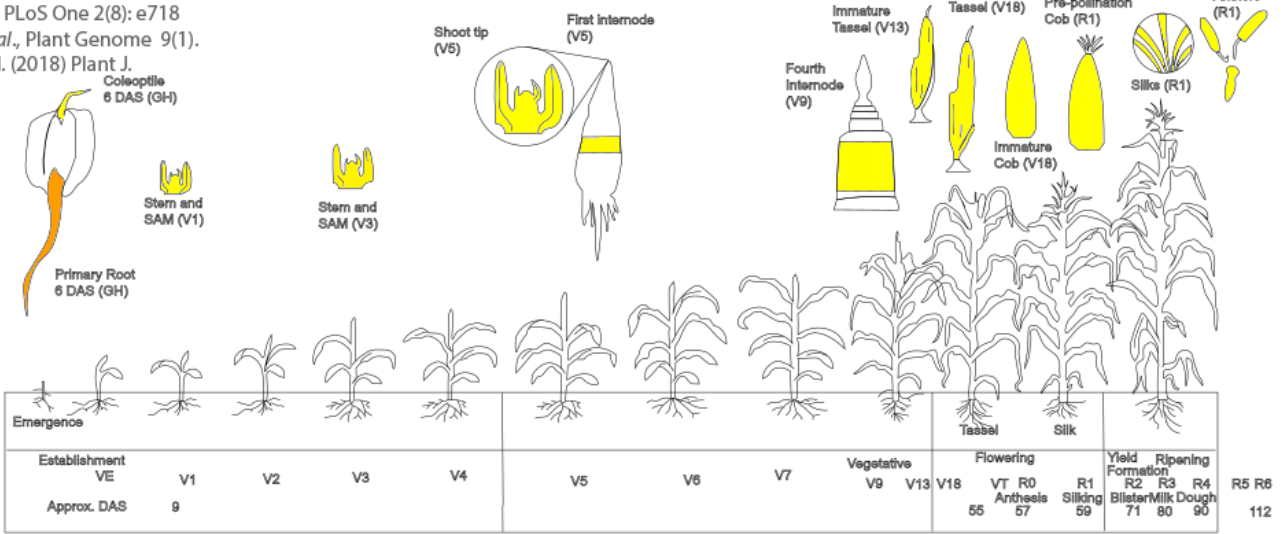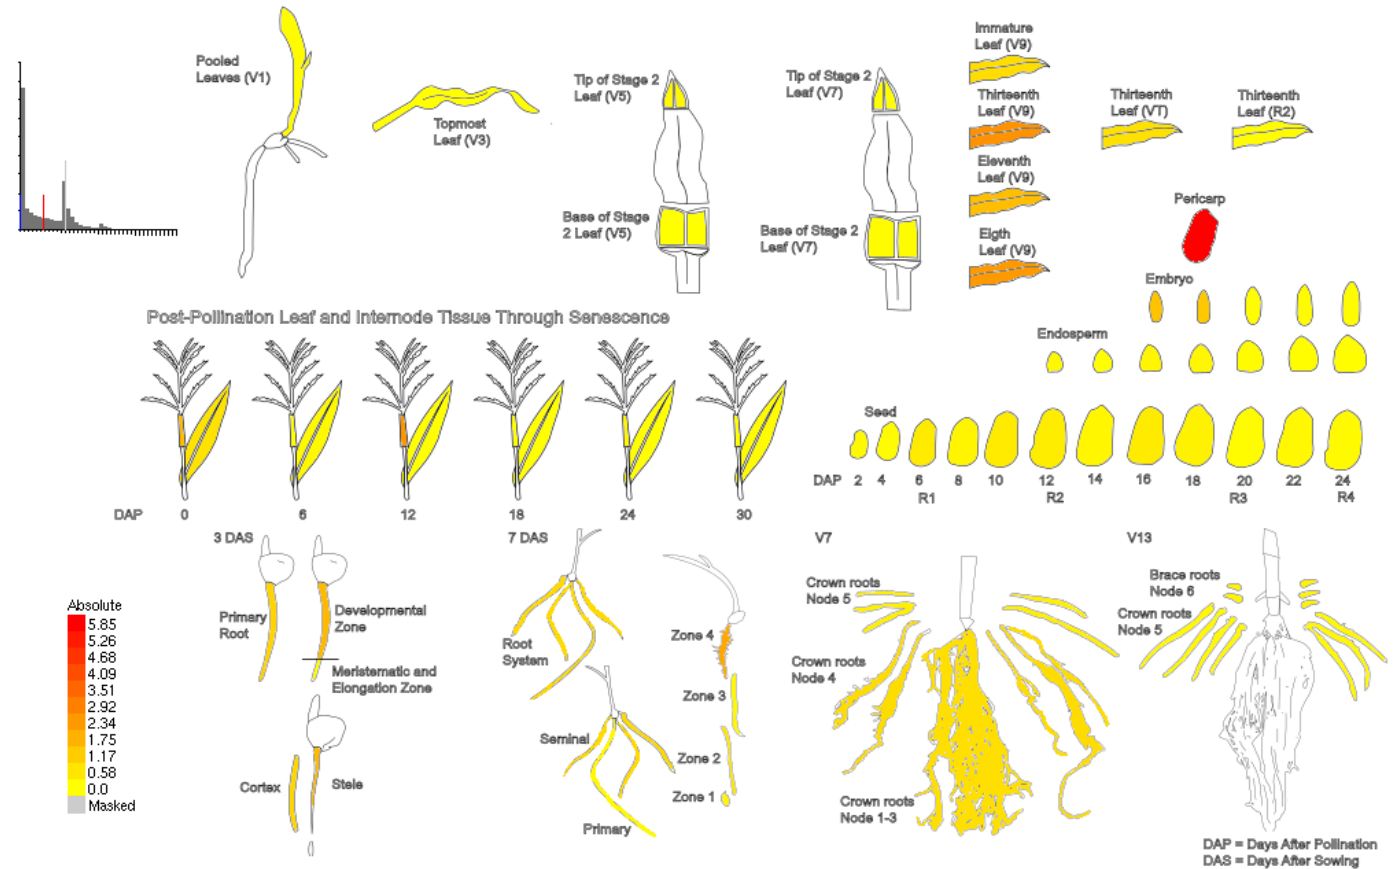

Adapters and low quality bases were removed using Cutadapt (v1.12) (Martin, 2011). All cleaned reads were aligned to the Z. mays inbred B73 AGPv4 genome assembly (Jiao *et al.*, 2017) with Bowtie2 (v2.2.3) (Langmead and Salzberg, 2012) and TopHat2 (v2.0.14) (Kim *et al.*, 2013). Fragments Per Kilobase of transcript per Million mapped reads (FPKM) gene expression values for Z. mays inbred B73 AGPv4 genes (Jiao *et al.*, 2017) was quantified with Cufflinks (v2.2.1) (Trapnell *et al.*, 2010).

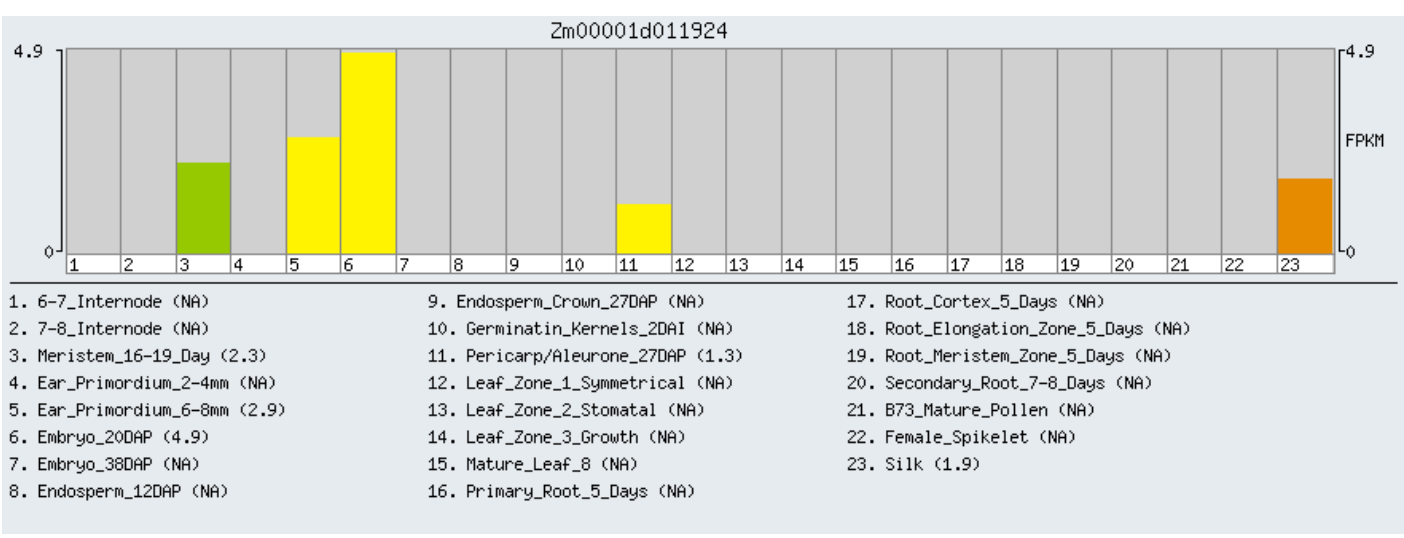



# Zm00001d014166

Maize eFP Browser at bar.utoronto.ca

Zm00001d014166

Zm00001d014166

Winter *et al.*, PLoS One 2(8): e718  
 Stelplflug *et al.*, Plant Genome 9(1).  
 Hoopes *et al.* (2018) Plant J.

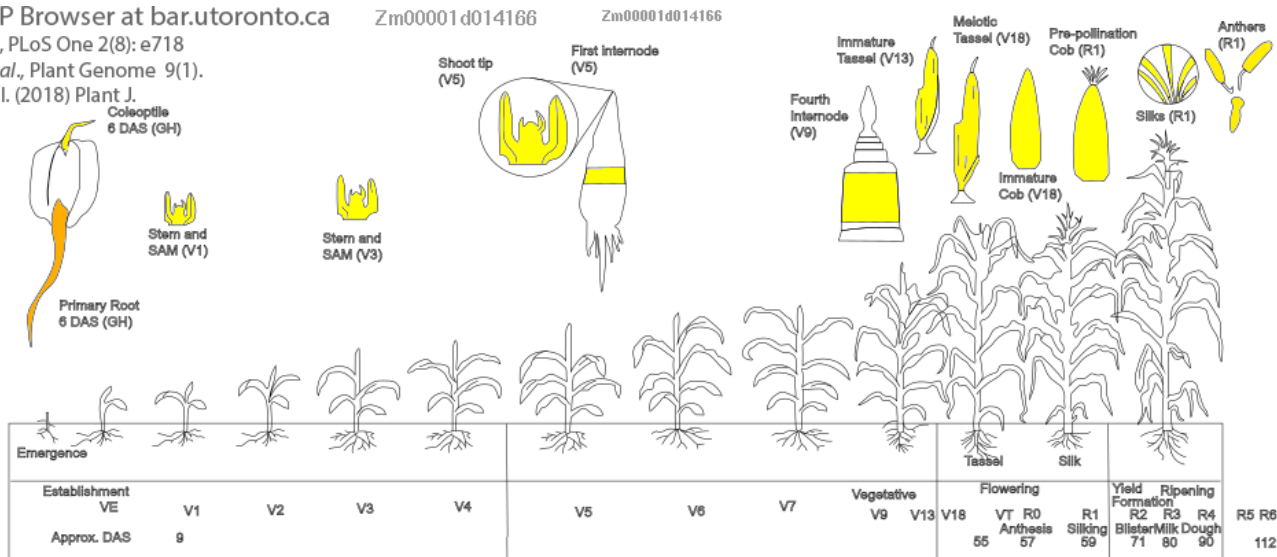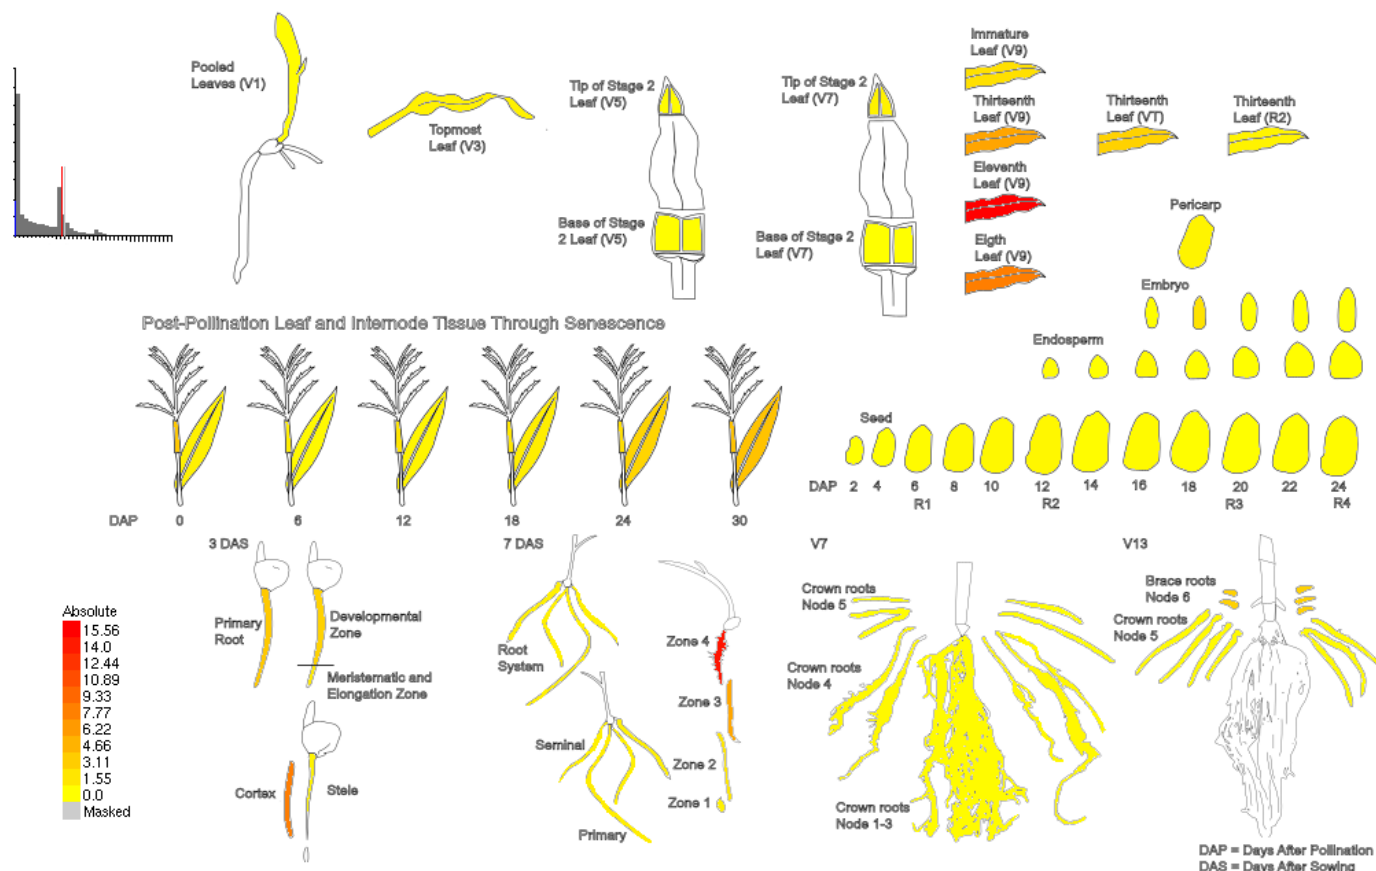

Adapters and low quality bases were removed using Cutadapt (v1.12) (Martin, 2011). All cleaned reads were aligned to the *Z. mays* inbred B73 AGPv4 genome assembly (Jiao *et al.*, 2017) with Bowtie2 (v2.2.3) (Langmead and Salzberg, 2012) and TopHat2 (v2.0.14) (Kim *et al.*, 2013). Fragments Per Kilobase of transcript per Million mapped reads (FPKM) gene expression values for *Z. mays* inbred B73 AGPv4 genes (Jiao *et al.*, 2017) was quantified with Cufflinks (v2.2.1) (Trapnell *et al.*, 2010).

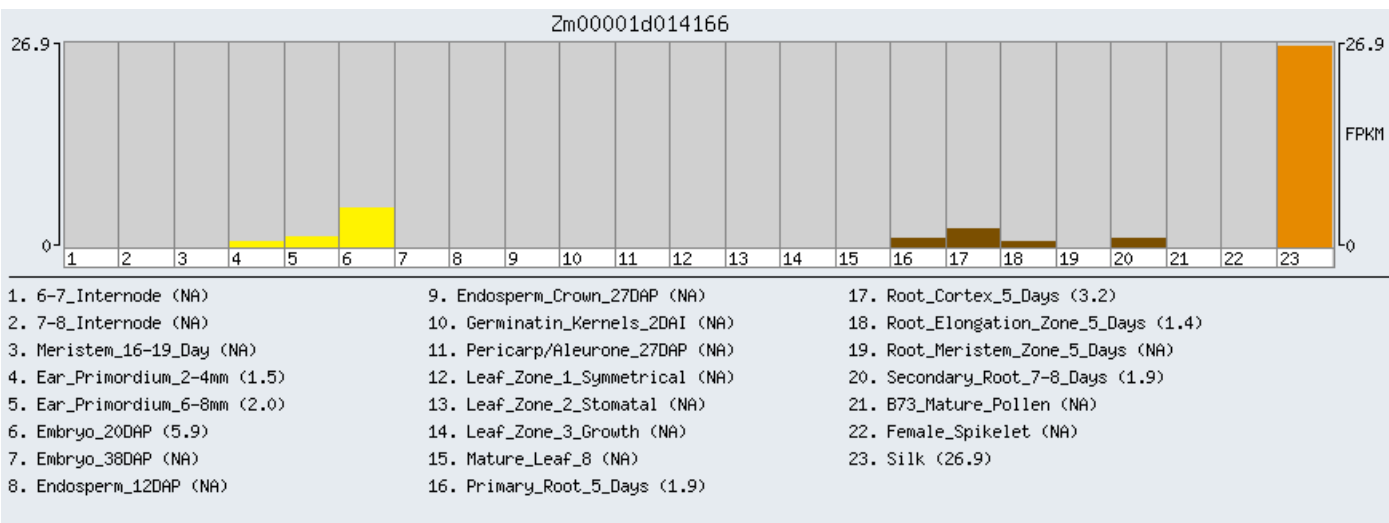

- 1. 6-7\_Internode (NA)
- 2. 7-8\_Internode (NA)
- 3. Meristem\_16-19\_Day (NA)
- 4. Ear\_Primary\_2-4mm (1.5)
- 5. Ear\_Primary\_6-8mm (2.0)
- 6. Embryo\_20DAP (5.9)
- 7. Embryo\_38DAP (NA)
- 8. Endosperm\_12DAP (NA)
- 9. Endosperm\_Crown\_27DAP (NA)
- 10. Germinatin\_Kernels\_2DAI (NA)
- 11. Pericarp/Aleurone\_27DAP (NA)
- 12. Leaf\_Zone\_1\_Symmetrical (NA)
- 13. Leaf\_Zone\_2\_Stomatal (NA)
- 14. Leaf\_Zone\_3\_Growth (NA)
- 15. Mature\_Leaf\_8 (NA)
- 16. Primary\_Root\_5\_Days (1.9)
- 17. Root\_Cortex\_5\_Days (3.2)
- 18. Root\_Elongation\_Zone\_5\_Days (1.4)
- 19. Root\_Meristem\_Zone\_5\_Days (NA)
- 20. Secondary\_Root\_7-8\_Days (1.9)
- 21. B73\_Mature\_Pollen (NA)
- 22. Female\_Spikelet (NA)
- 23. Silk (26.9)



# Zm00001d017756

Maize eFP Browser at bar.utoronto.ca

Zm00001d017756

Zm00001d017756

Winter *et al.*, *PLoS One* 2(8): e718  
 Stelplflug *et al.*, *Plant Genome* 9(1).  
 Hoopes *et al.* (2018) *Plant J.*

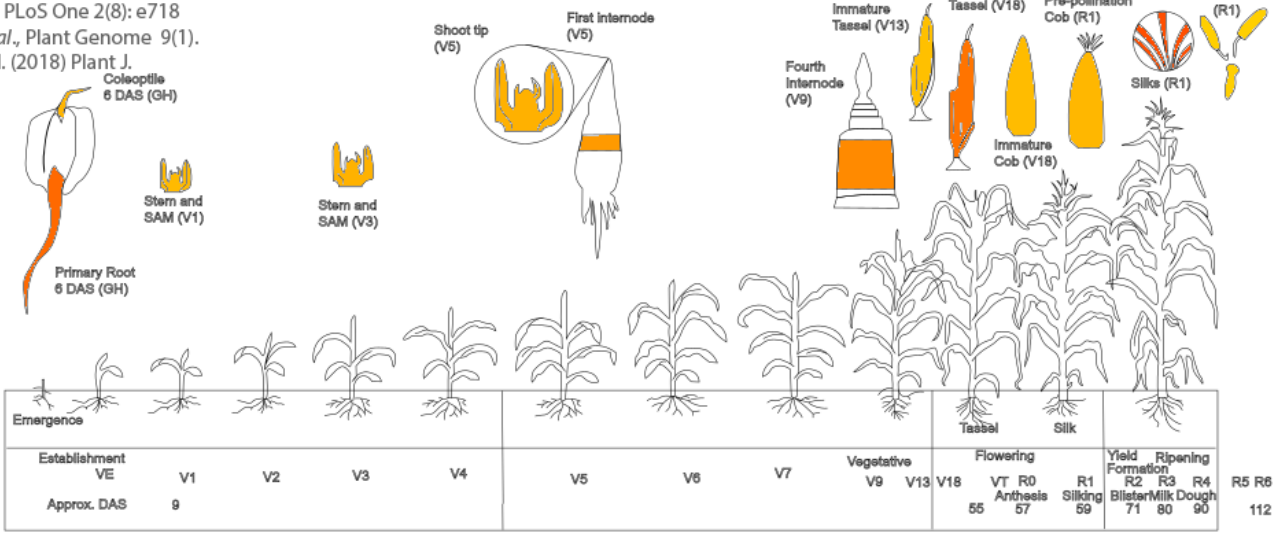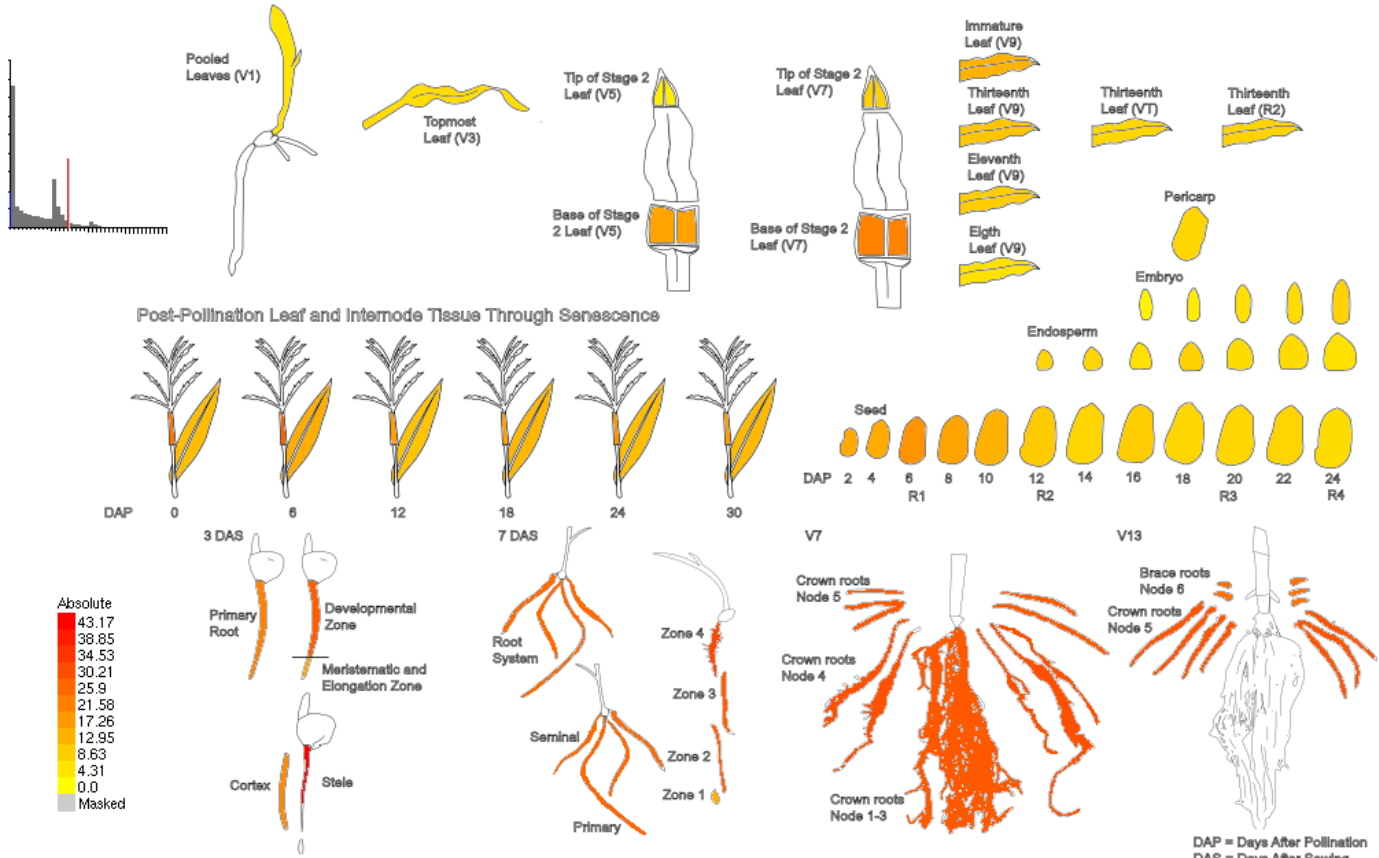

Adapters and low quality bases were removed using Cutadapt (v1.12) (Martin, 2011). All cleaned reads were aligned to the *Z. mays* inbred B73 AGPv4 genome assembly (Jiao *et al.*, 2017) with Bowtie2 (v2.2.3) (Langmead and Salzberg, 2012) and TopHat2 (v2.0.14) (Kim *et al.*, 2013). Fragments Per Kilobase of transcript per Million mapped reads (FPKM) gene expression values for *Z. mays* inbred B73 AGPv4 genes (Jiao *et al.*, 2017) was quantified with Cufflinks (v2.2.1) (Trapnell *et al.*, 2010).

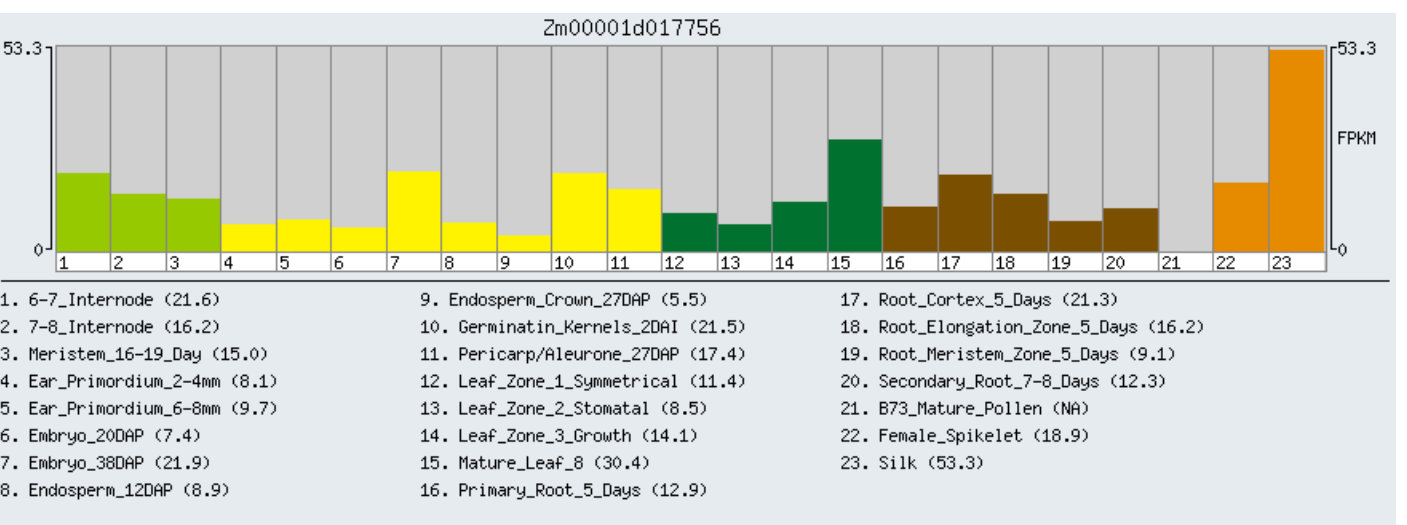

# Zm00001d017770

Maize eFP Browser at bar.utoronto.ca

Zm00001d017770

Zm00001d017770

Winter et al., PLoS One 2(8): e718  
 Stelpflug et al., Plant Genome 9(1).  
 Hoopes et al. (2018) Plant J.

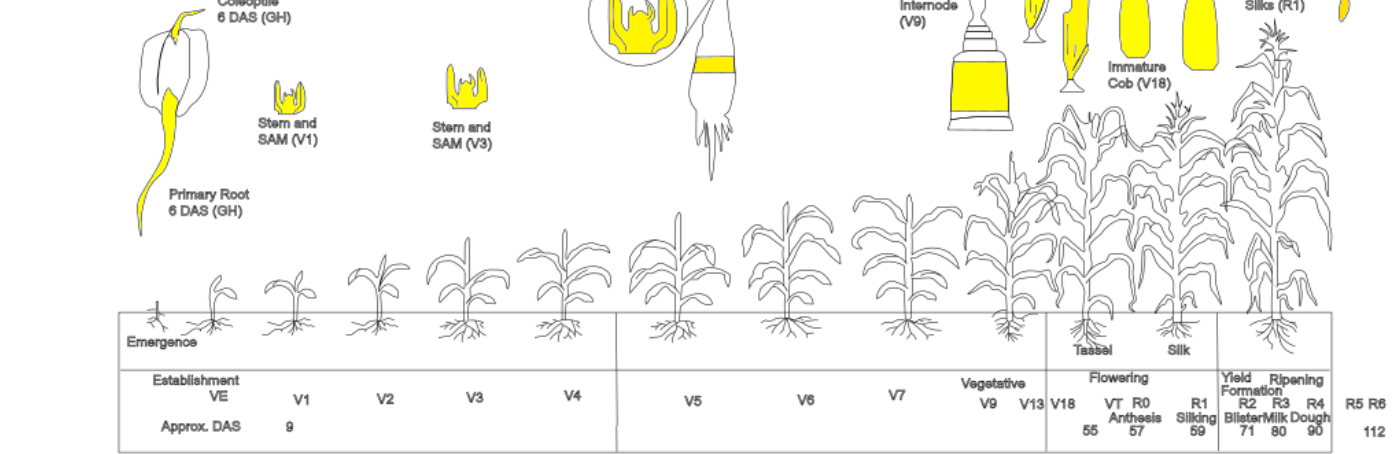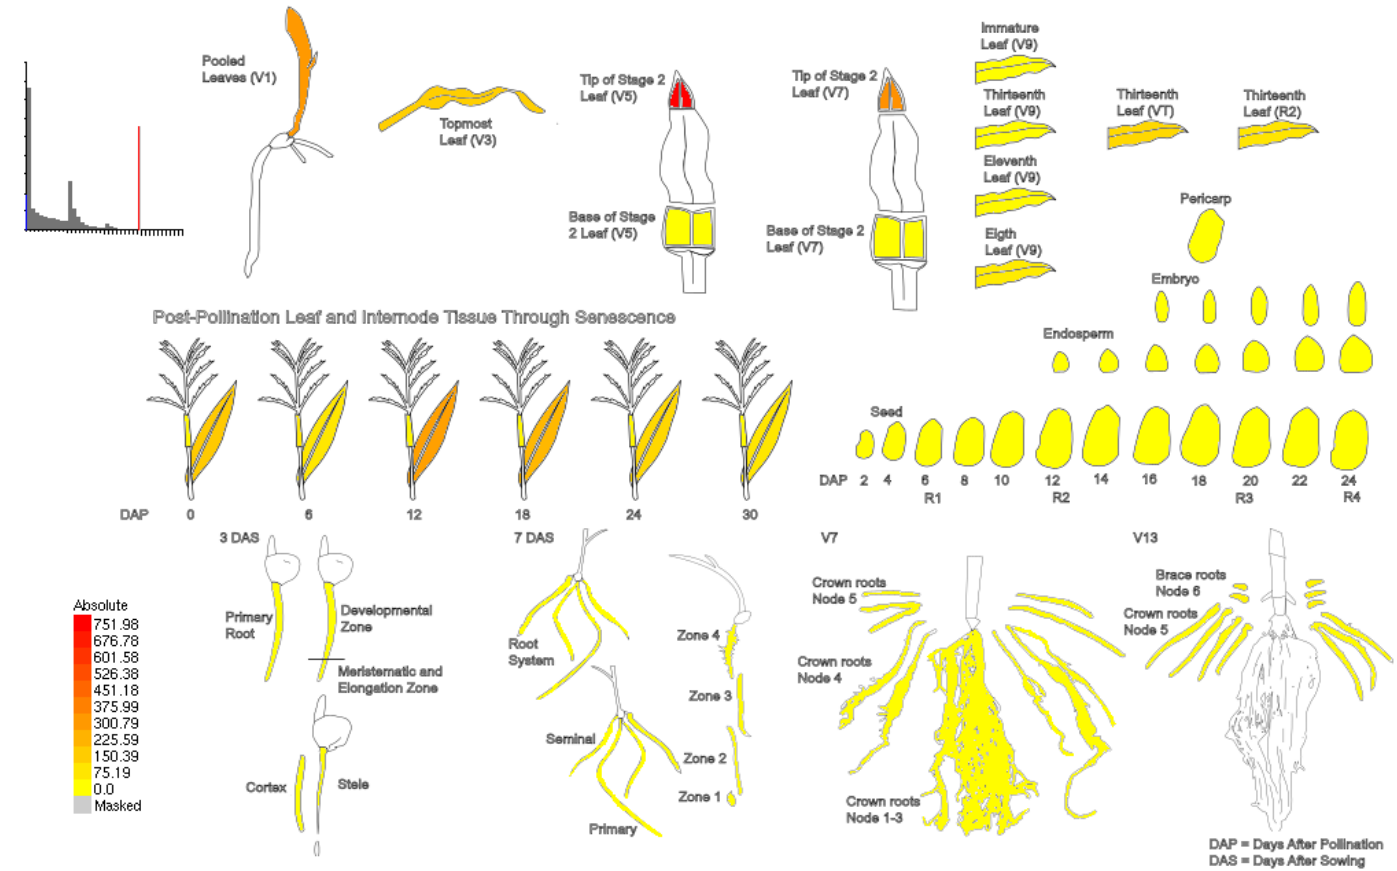

Adapters and low quality bases were removed using Cutadapt (v1.12) (Martin, 2011). All cleaned reads were aligned to the *Z. mays* inbred B73 AGPv4 genome assembly (Jiao et al., 2017) with Bowtie2 (v2.2.3) (Langmead and Salzberg, 2012) and TopHat2 (v2.0.14) (Kim et al., 2013). Fragments Per Kilobase of transcript per Million mapped reads (FPKM) gene expression values for *Z. mays* inbred B73 AGPv4 genes (Jiao et al., 2017) was quantified with Cufflinks (v2.2.1) (Trapnell et al., 2010).

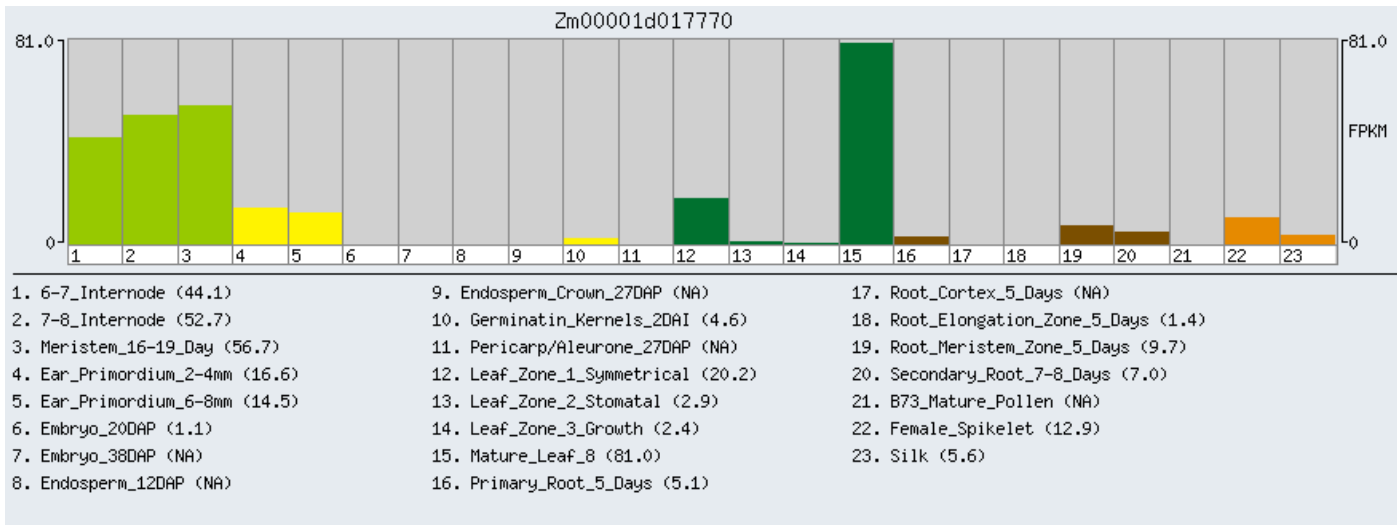

# Zm00001d017866

Maize eFP Browser at bar.utoronto.ca

Zm00001d017866

Zm00001d017866

Winter *et al.*, PLoS One 2(8): e718  
 Stelplflug *et al.*, Plant Genome 9(1).  
 Hoopes *et al.* (2018) Plant J.

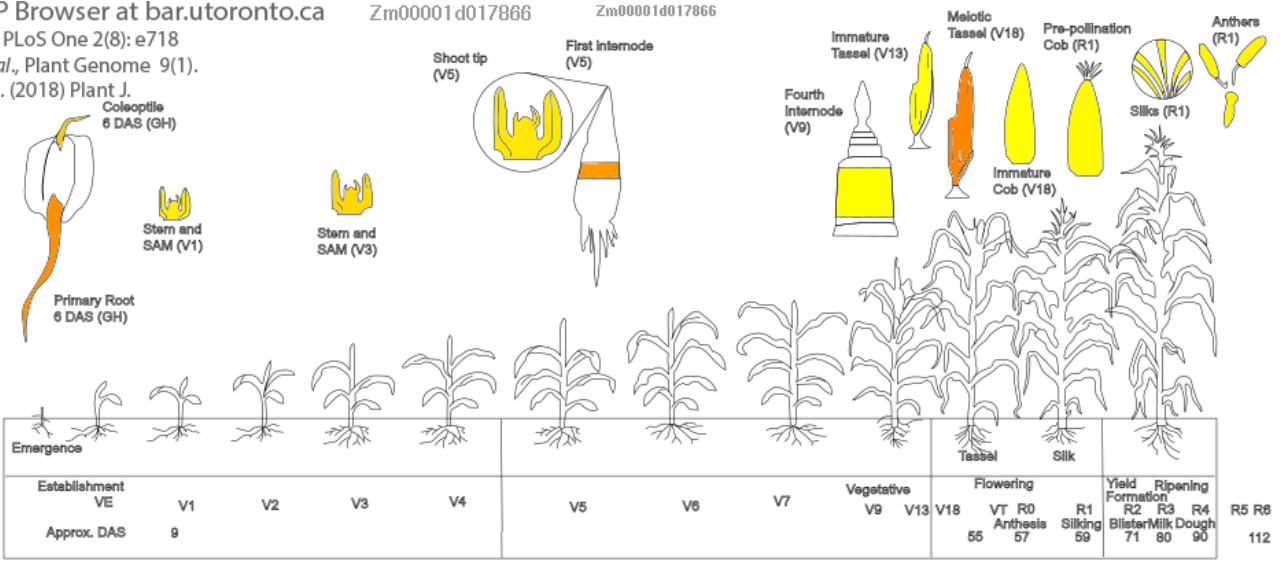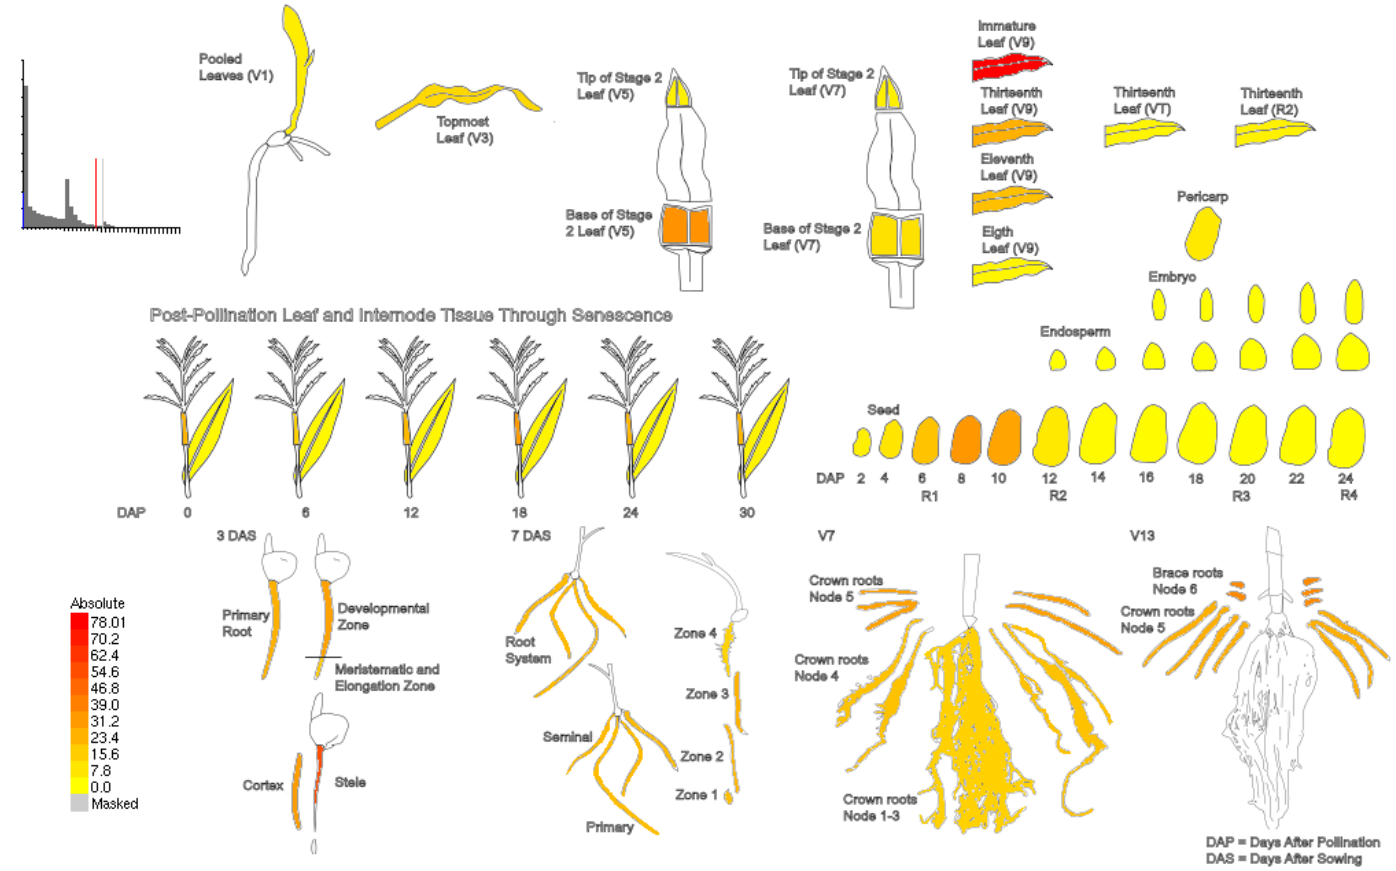

Adapters and low quality bases were removed using Cutadapt (v1.12) (Martin, 2011). All cleaned reads were aligned to the *Z. mays* inbred B73 AGPv4 genome assembly (Jiao *et al.*, 2017) with Bowtie2 (v2.2.3) (Langmead and Salzberg, 2012) and TopHat2 (v2.0.14) (Kim *et al.*, 2013). Fragments Per Kilobase of transcript per Million mapped reads (FPKM) gene expression values for *Z. mays* inbred B73 AGPv4 genes (Jiao *et al.*, 2017) was quantified with Cufflinks (v2.2.1) (Trapnell *et al.*, 2010).

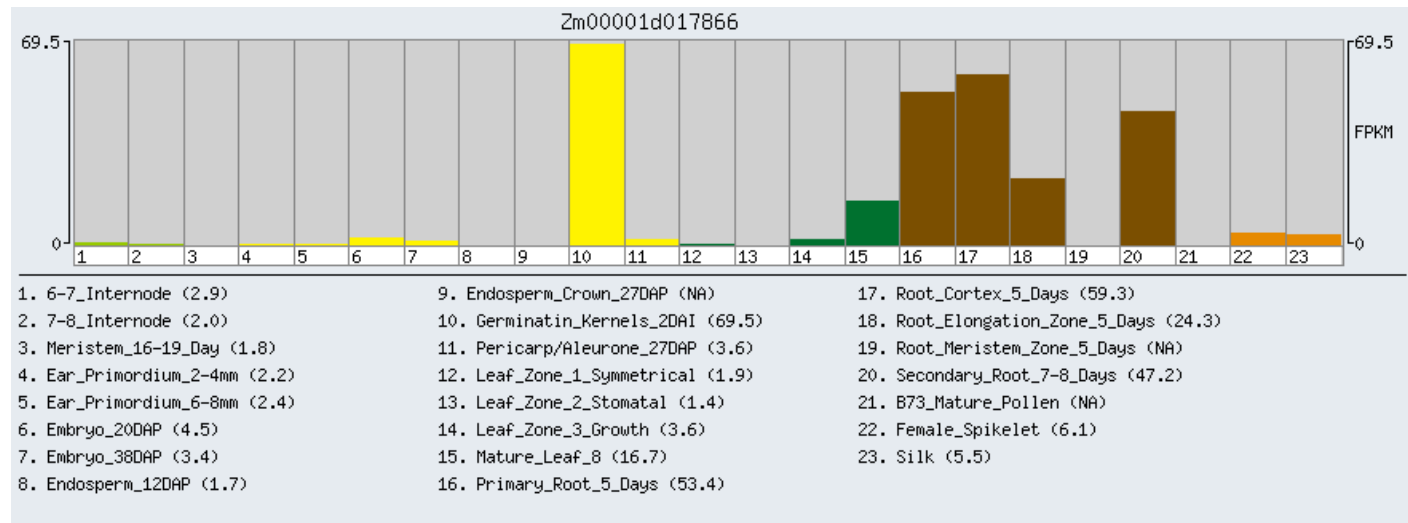

# Zm00001d017866

Maize eFP Browser at bar.utoronto.ca

Zm00001d021760 Zm00001d021760

Winter et al., PLoS One 2(8): e718  
Stelpflug et al., Plant Genome 9(1).  
Hoopes et al. (2018) Plant J.

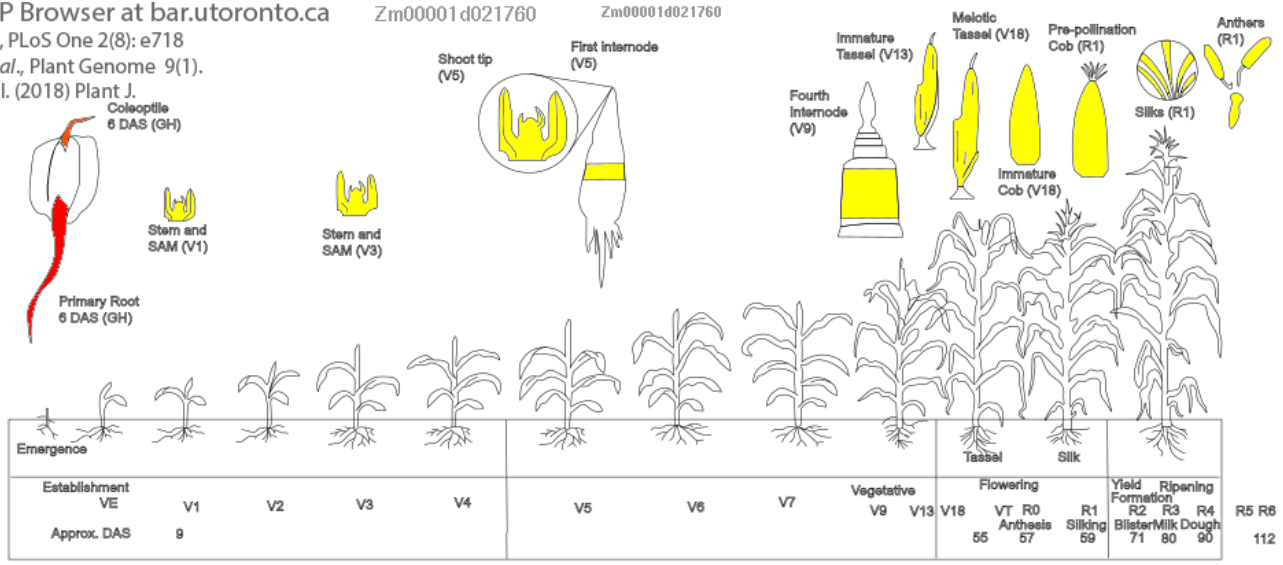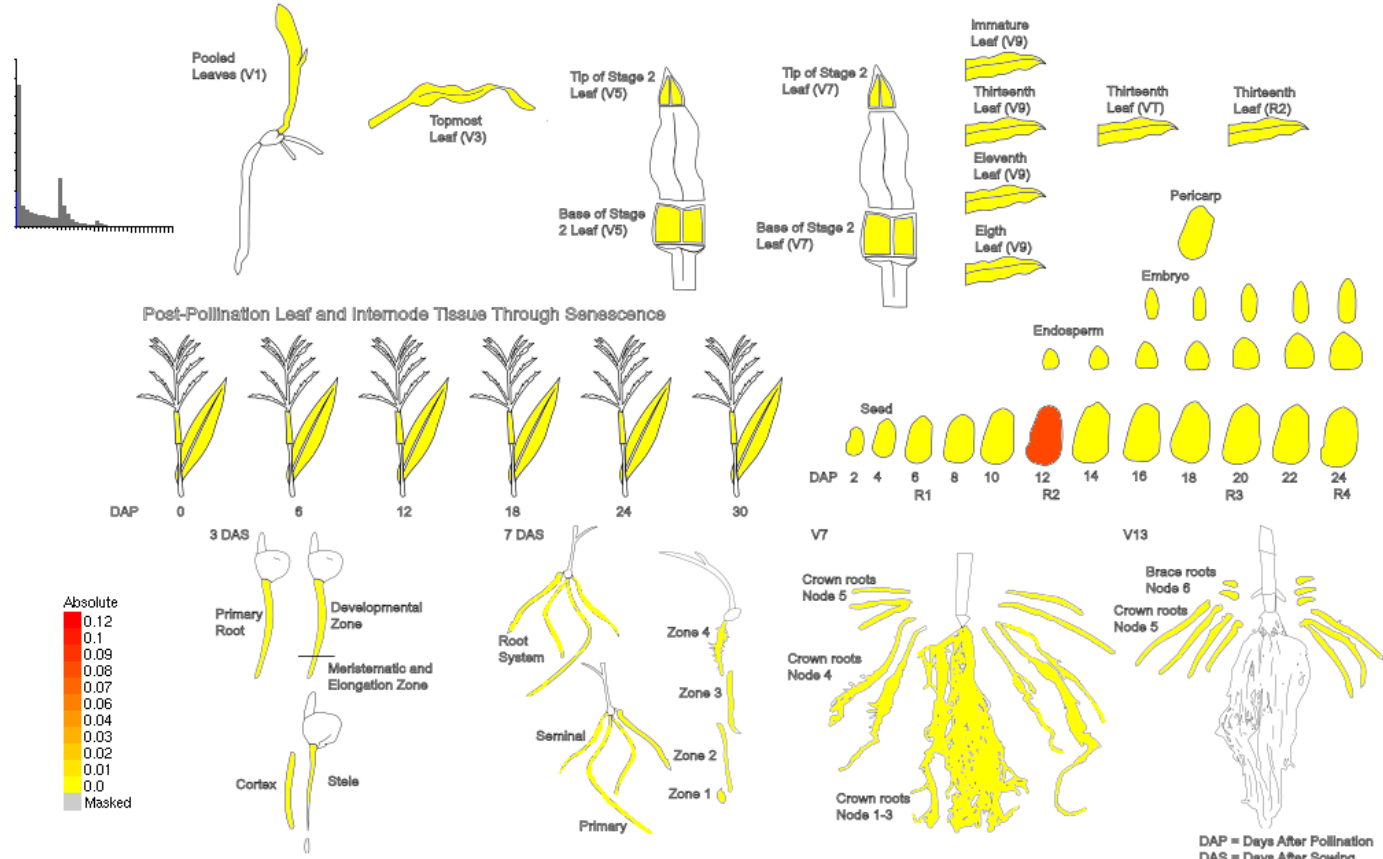

Adapters and low quality bases were removed using Cutadapt (v1.12) (Martin, 2011). All cleaned reads were aligned to the Z. mays inbred B73 AGPv4 genome assembly (Jiao et al., 2017) with Bowtie2 (v2.2.3) (Langmead and Salzberg, 2012) and TopHat2 (v2.0.14) (Kim et al., 2013). Fragments Per Kilobase of transcript per Million mapped reads (FPKM) gene expression values for Z. mays inbred B73 AGPv4 genes (Jiao et al., 2017) was quantified with Cufflinks (v2.2.1) (Trapnell et al., 2010).

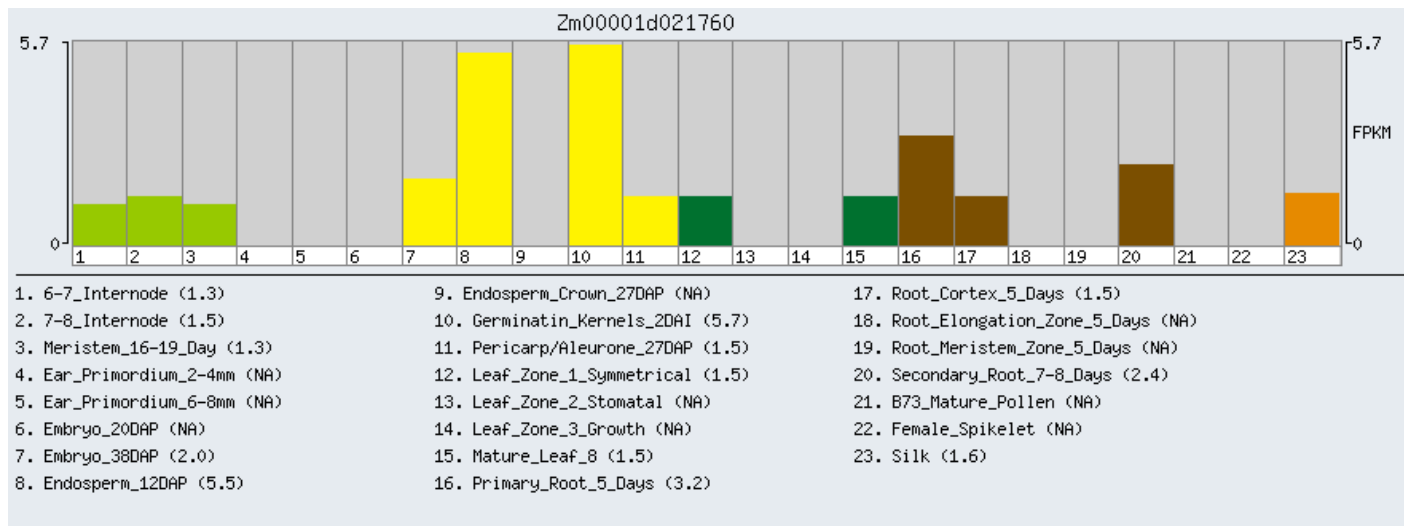

# Zm00001d021760

Maize eFP Browser at bar.utoronto.ca

Zm00001d021760

Zm00001d021760

Winter *et al.*, PLoS One 2(8): e718  
 Stelplflug *et al.*, Plant Genome 9(1).  
 Hoopes *et al.* (2018) Plant J.

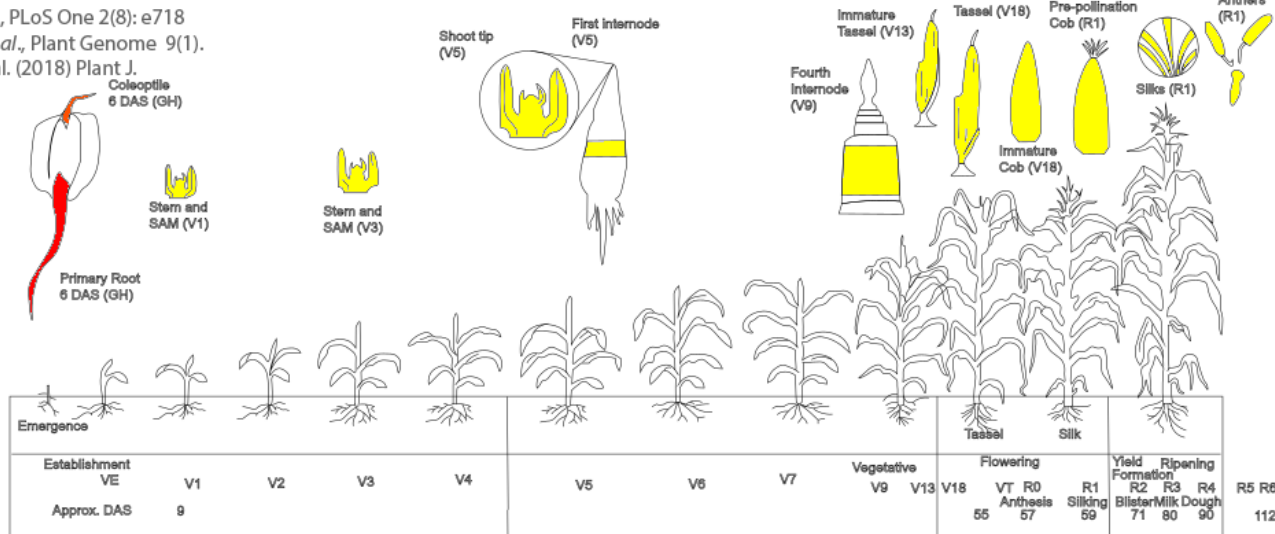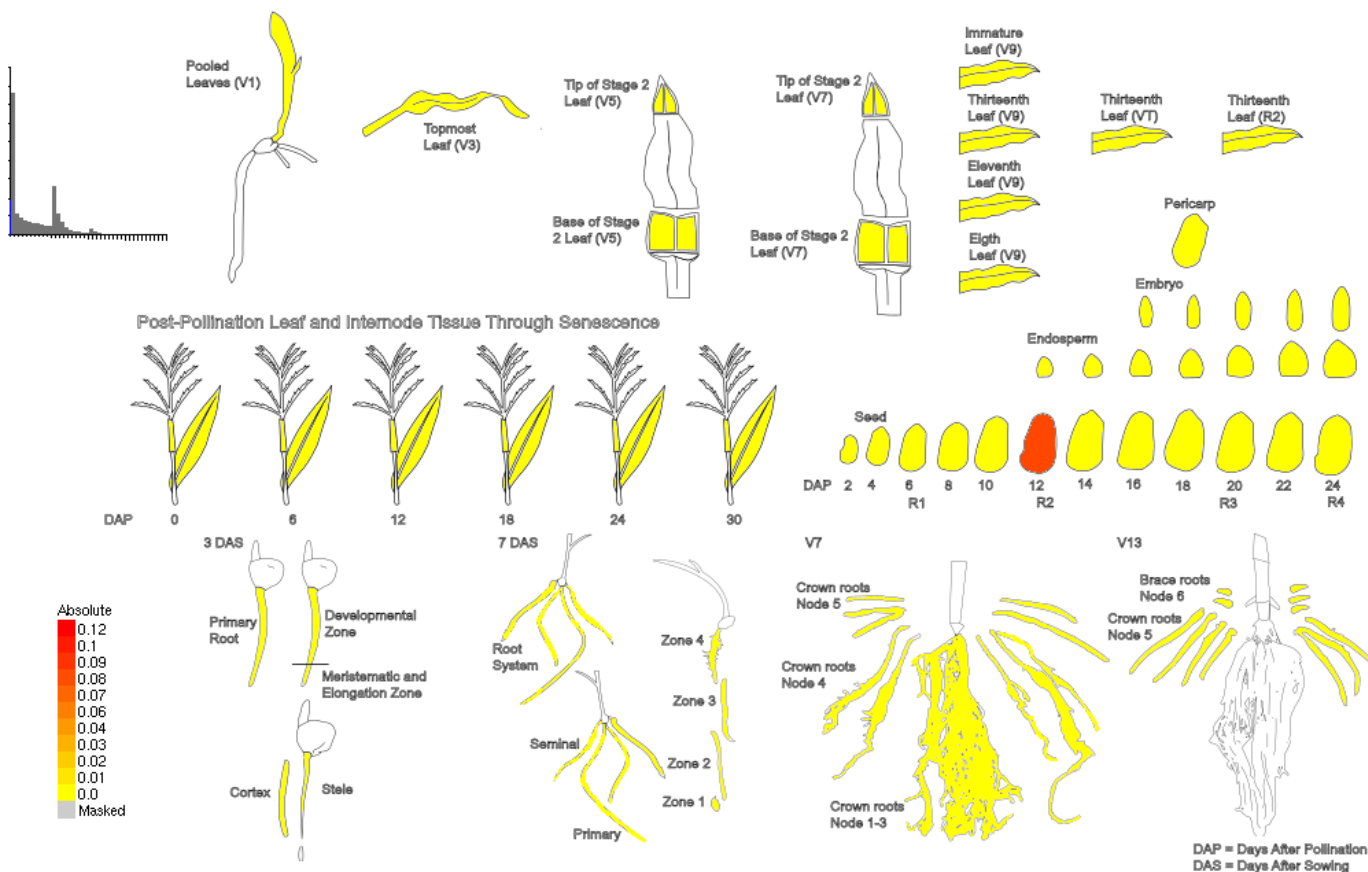

Adapters and low quality bases were removed using Cutadapt (v1.12) (Martin, 2011). All cleaned reads were aligned to the Z. mays inbred B73 AGPv4 genome assembly (Jiao *et al.*, 2017) with Bowtie2 (v2.2.3) (Langmead and Salzberg, 2012) and TopHat2 (v2.0.14) (Kim *et al.*, 2013). Fragments Per Kilobase of transcript per Million mapped reads (FPKM) gene expression values for Z. mays inbred B73 AGPv4 genes (Jiao *et al.*, 2017) was quantified with Cufflinks (v2.2.1) (Trapnell *et al.*, 2010).

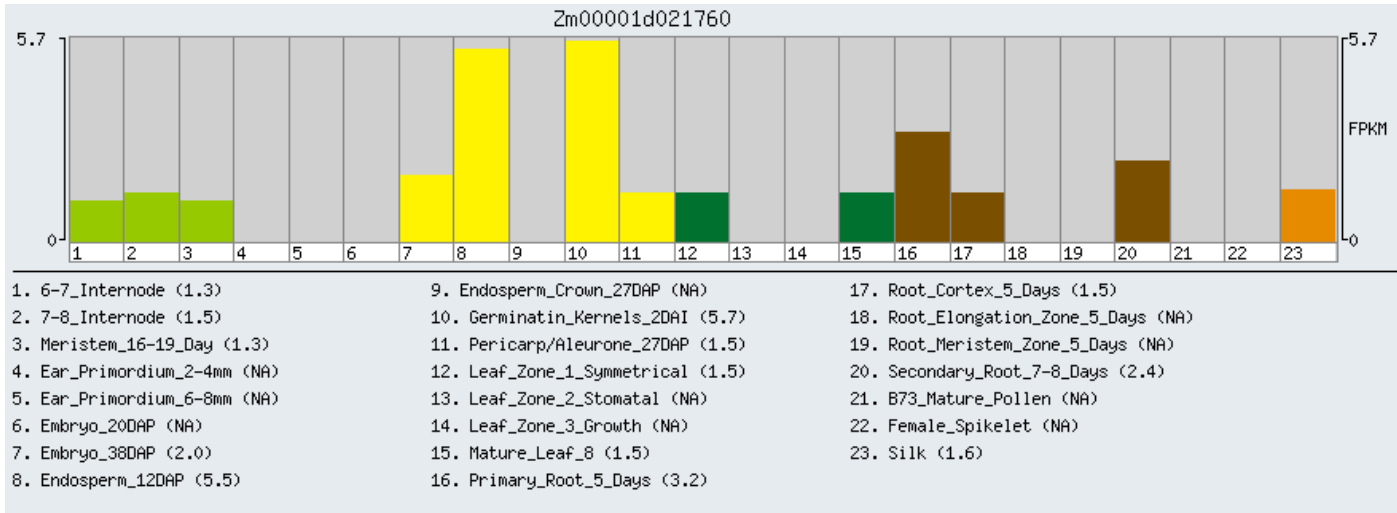

# Zm00001d030812

Maize eFP Browser at bar.utoronto.ca  
 Winter *et al.*, PLoS One 2(8): e718  
 Stelpflug *et al.*, Plant Genome 9(1).  
 Hoopes *et al.* (2018) Plant J.

Zm00001d030812 Zm00001d030812

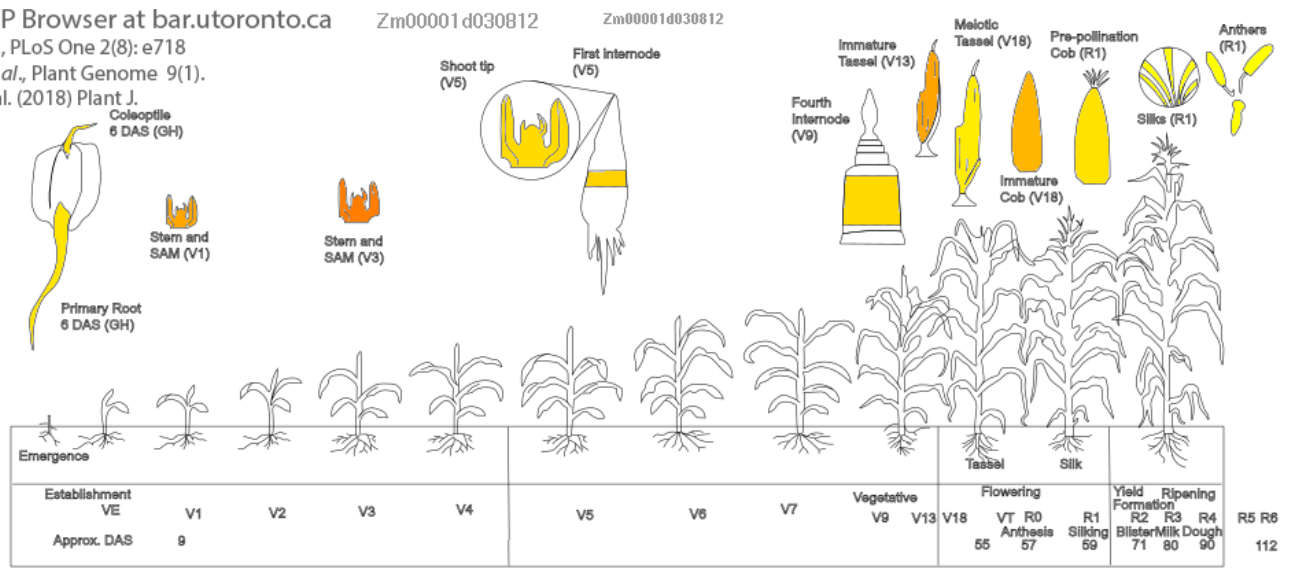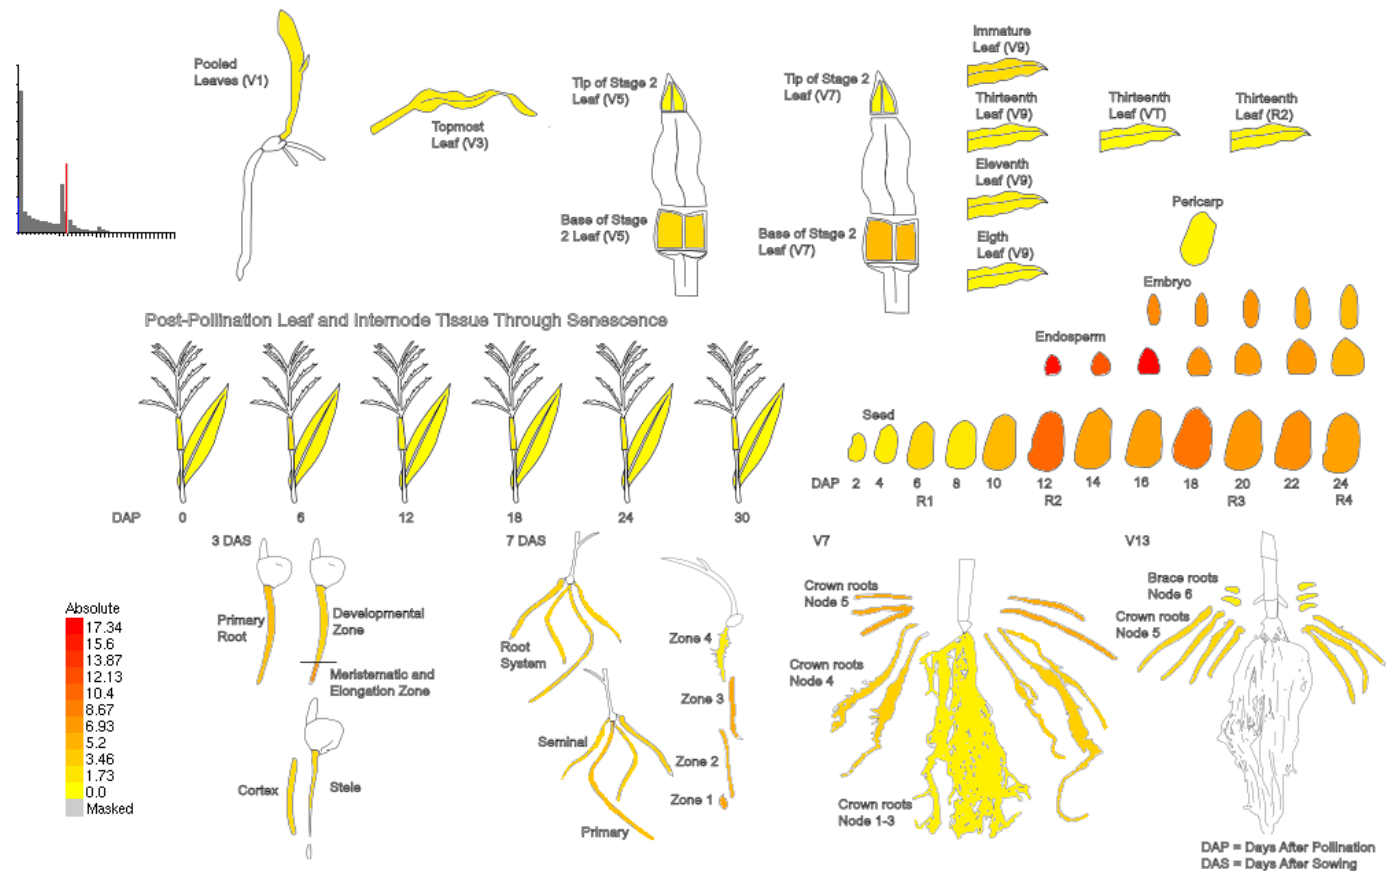

Adapters and low quality bases were removed using Cutadapt (v1.12) (Martin, 2011). All cleaned reads were aligned to the *Z. mays* inbred B73 AGPv4 genome assembly (Jiao *et al.*, 2017) with Bowtie2 (v2.2.3) (Langmead and Salzberg, 2012) and TopHat2 (v2.0.14) (Kim *et al.*, 2013). Fragments Per Kilobase of transcript per Million mapped reads (FPKM) gene expression values for *Z. mays* inbred B73 AGPv4 genes (Jiao *et al.*, 2017) was quantified with Cufflinks (v2.2.1) (Trapnell *et al.*, 2010).

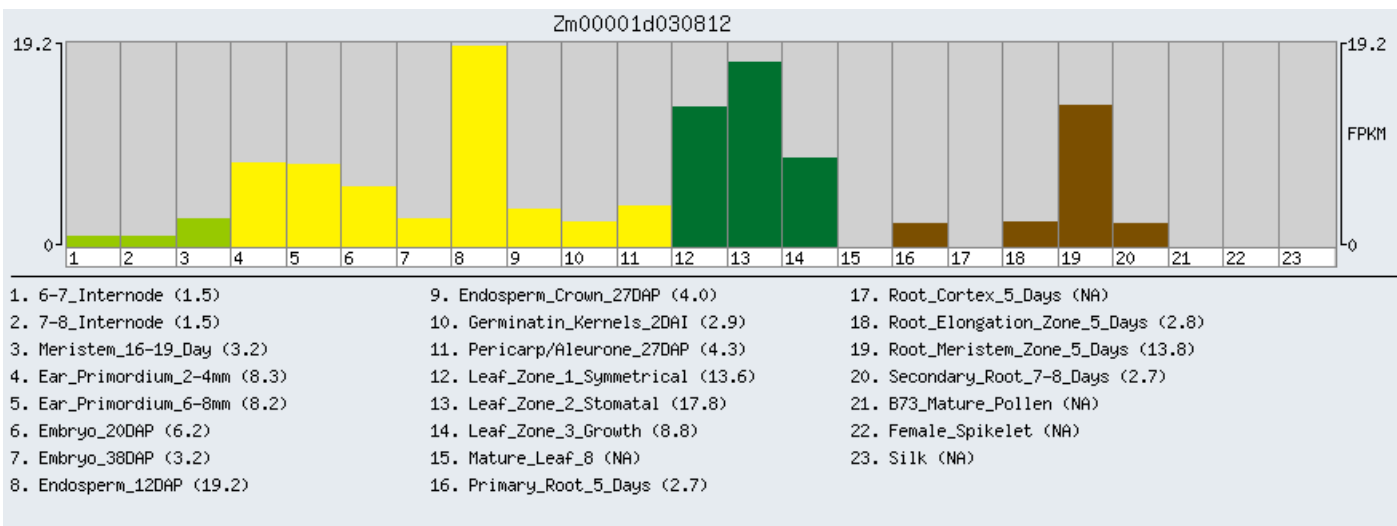



# Zm00001d041358

Maize eFP Browser at bar.utoronto.ca

Zm00001d041358

Zm00001d041358

Winter *et al.*, PLoS One 2(8): e718  
 Stelpflug *et al.*, Plant Genome 9(1).  
 Hoopes *et al.* (2018) Plant J.

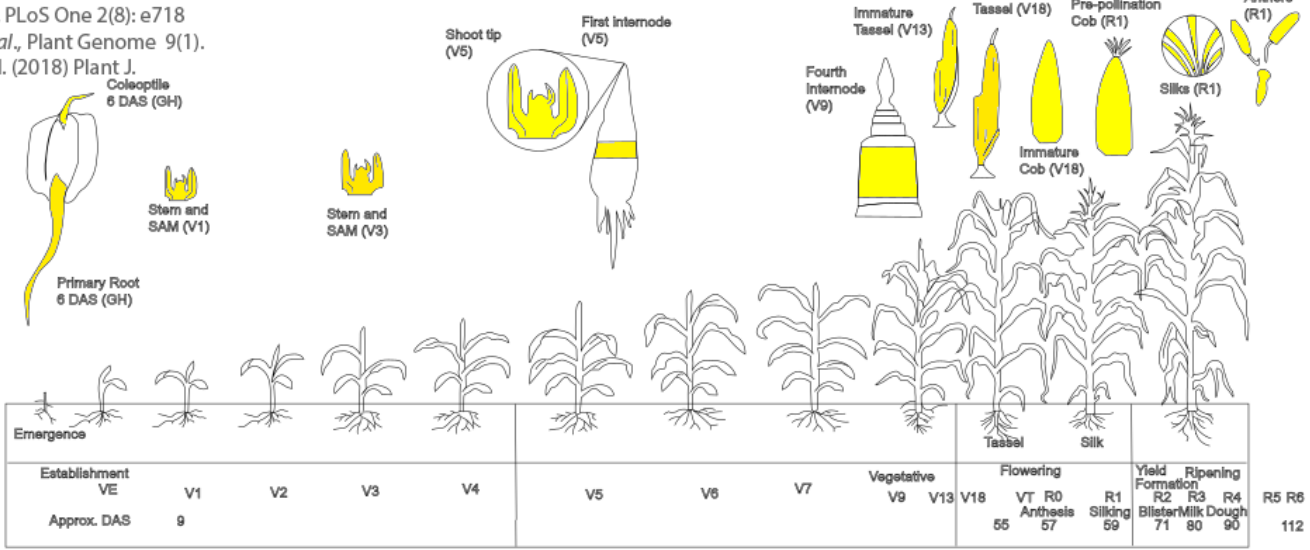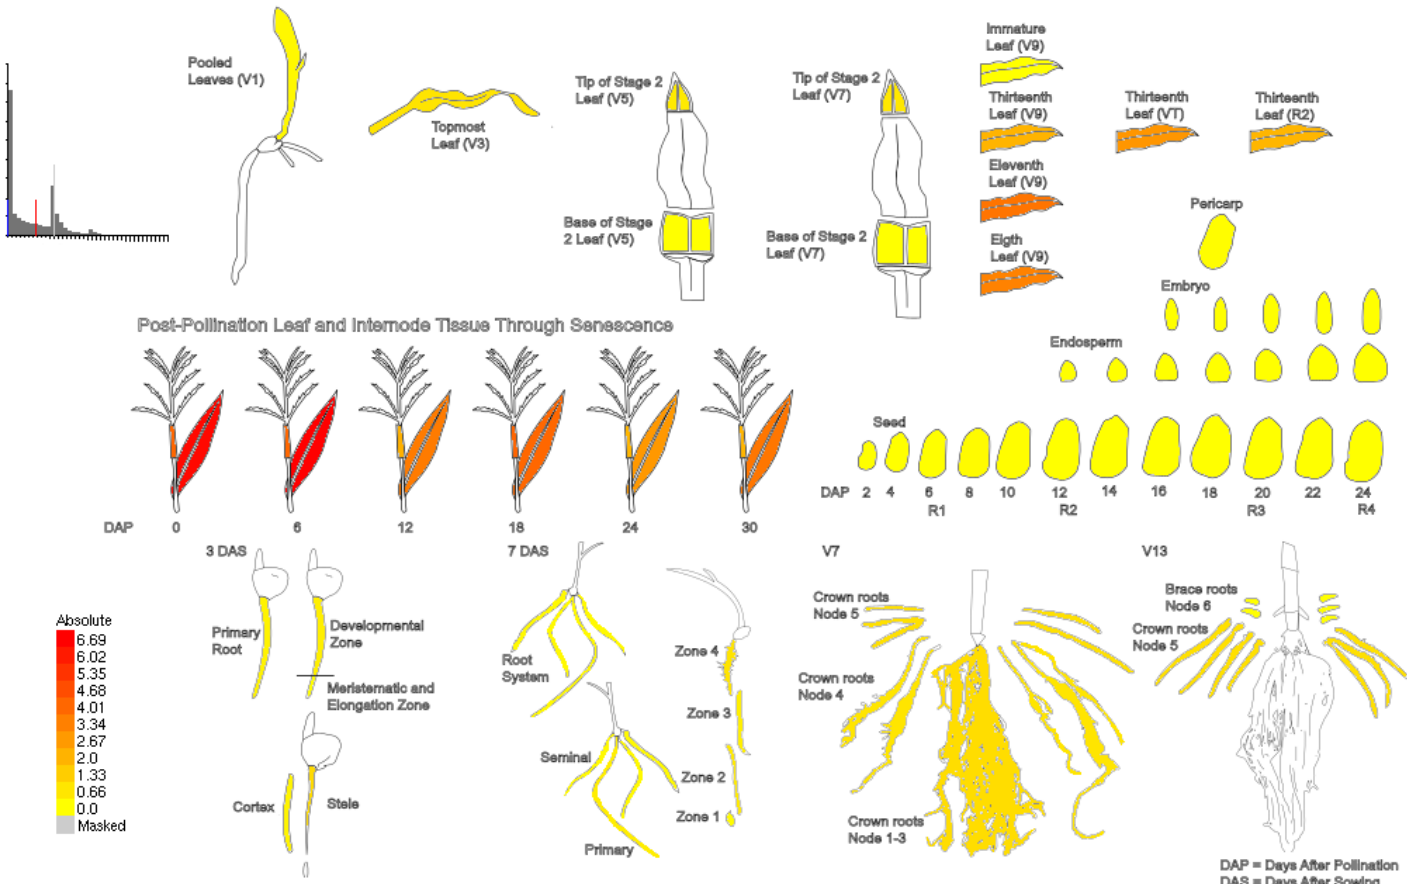

Adapters and low quality bases were removed using Cutadapt (v1.12) (Martin, 2011). All cleaned reads were aligned to the Z. mays inbred B73 AGPv4 genome assembly (Jiao *et al.*, 2017) with Bowtie2 (v2.2.3) (Langmead and Salzberg, 2012) and TopHat2 (v2.0.14) (Kim *et al.*, 2013). Fragments Per Kilobase of transcript per Million mapped reads (FPKM) gene expression values for Z. mays inbred B73 AGPv4 genes (Jiao *et al.*, 2017) was quantified with Cufflinks (v2.2.1) (Trapnell *et al.*, 2010).

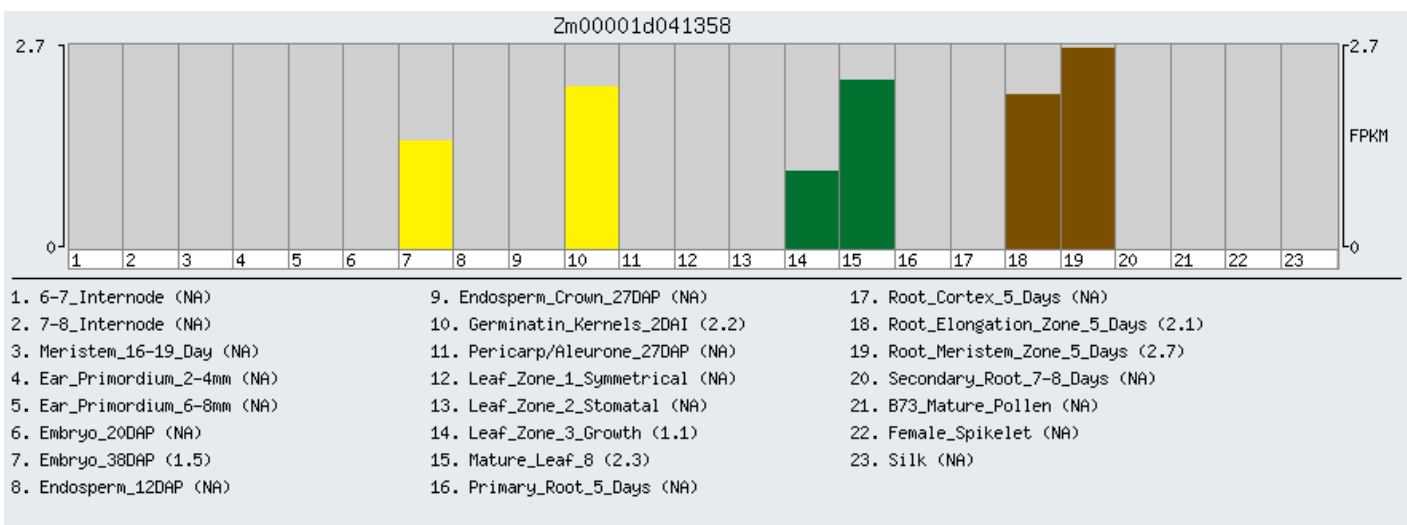

# Zm00001d042191

Maize eFP Browser at bar.utoronto.ca

Zm00001d042191

Zm00001d042191

Winter *et al.*, PLoS One 2(8): e718  
 Stelpflug *et al.*, Plant Genome 9(1).  
 Hoopes *et al.* (2018) Plant J.

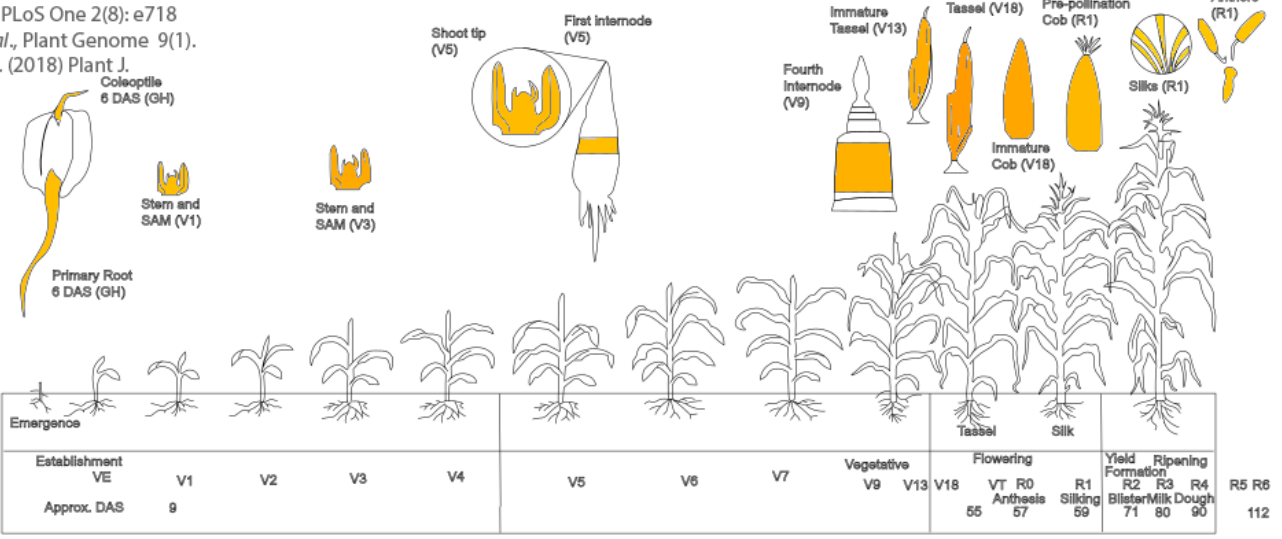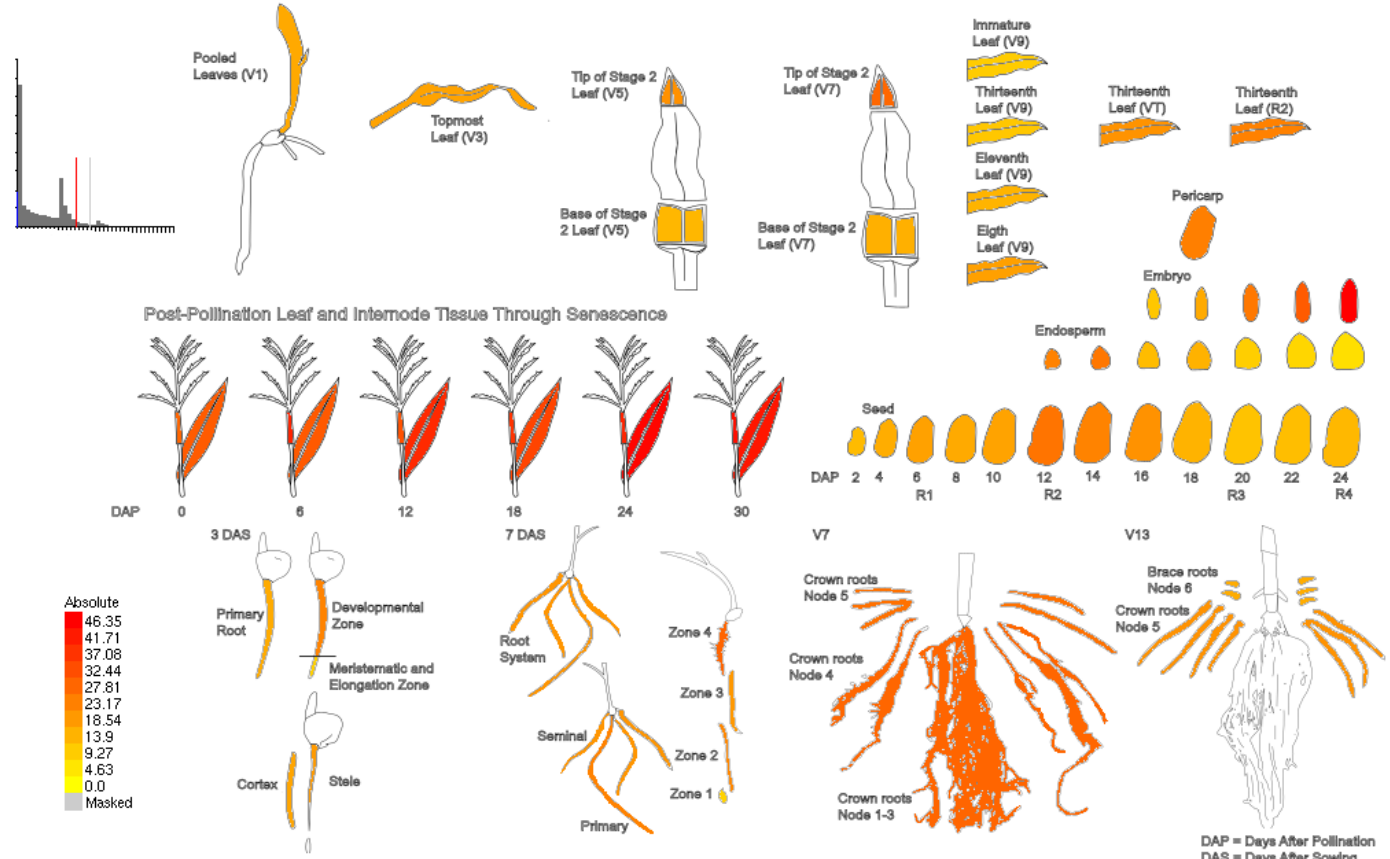

Adapters and low quality bases were removed using Cutadapt (v1.12) (Martin, 2011). All cleaned reads were aligned to the *Z. mays* inbred B73 AGPv4 genome assembly (Jiao *et al.*, 2017) with Bowtie2 (v2.2.3) (Langmead and Salzberg, 2012) and TopHat2 (v2.0.14) (Kim *et al.*, 2013). Fragments Per Kilobase of transcript per Million mapped reads (FPKM) gene expression values for *Z. mays* inbred B73 AGPv4 genes (Jiao *et al.*, 2017) was quantified with Cufflinks (v2.2.1) (Trapnell *et al.*, 2010).

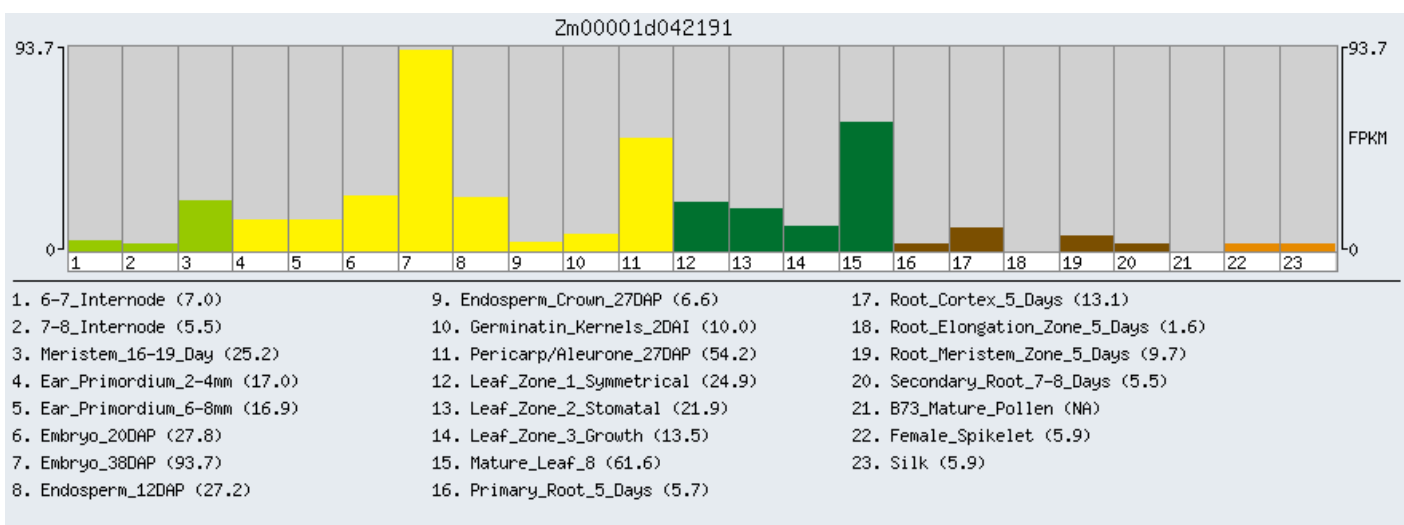



# Zm00001d044255

Maize eFP Browser at bar.utoronto.ca

Zm00001d044255

Zm00001d044255

Winter *et al.*, *PLoS One* 2(8): e718  
 Stelpflug *et al.*, *Plant Genome* 9(1).  
 Hoopes *et al.* (2018) *Plant J.*

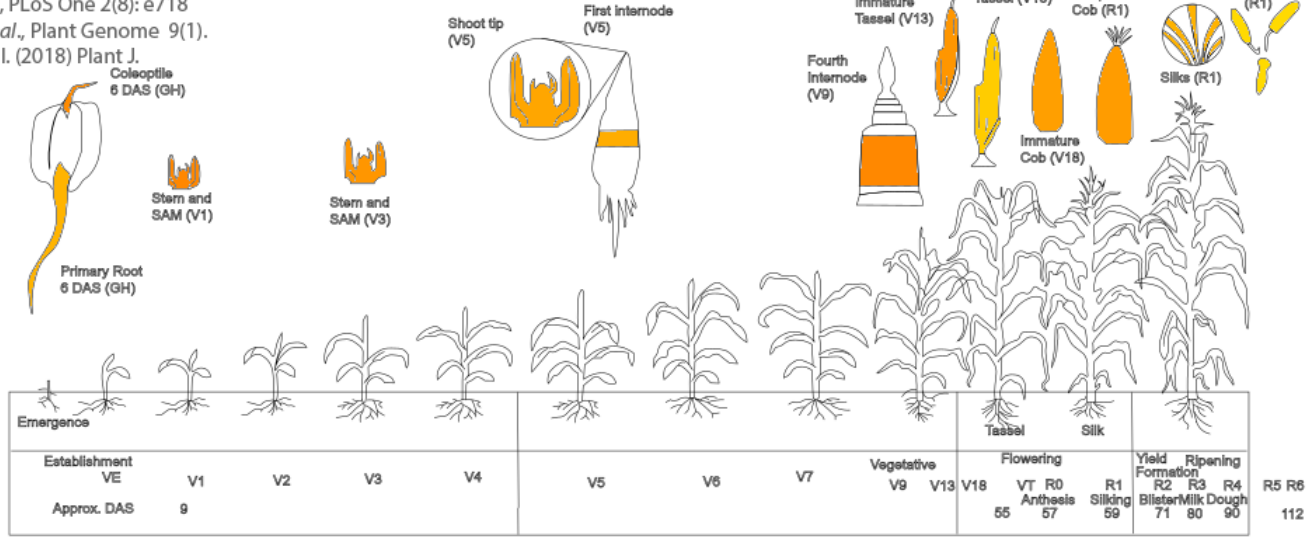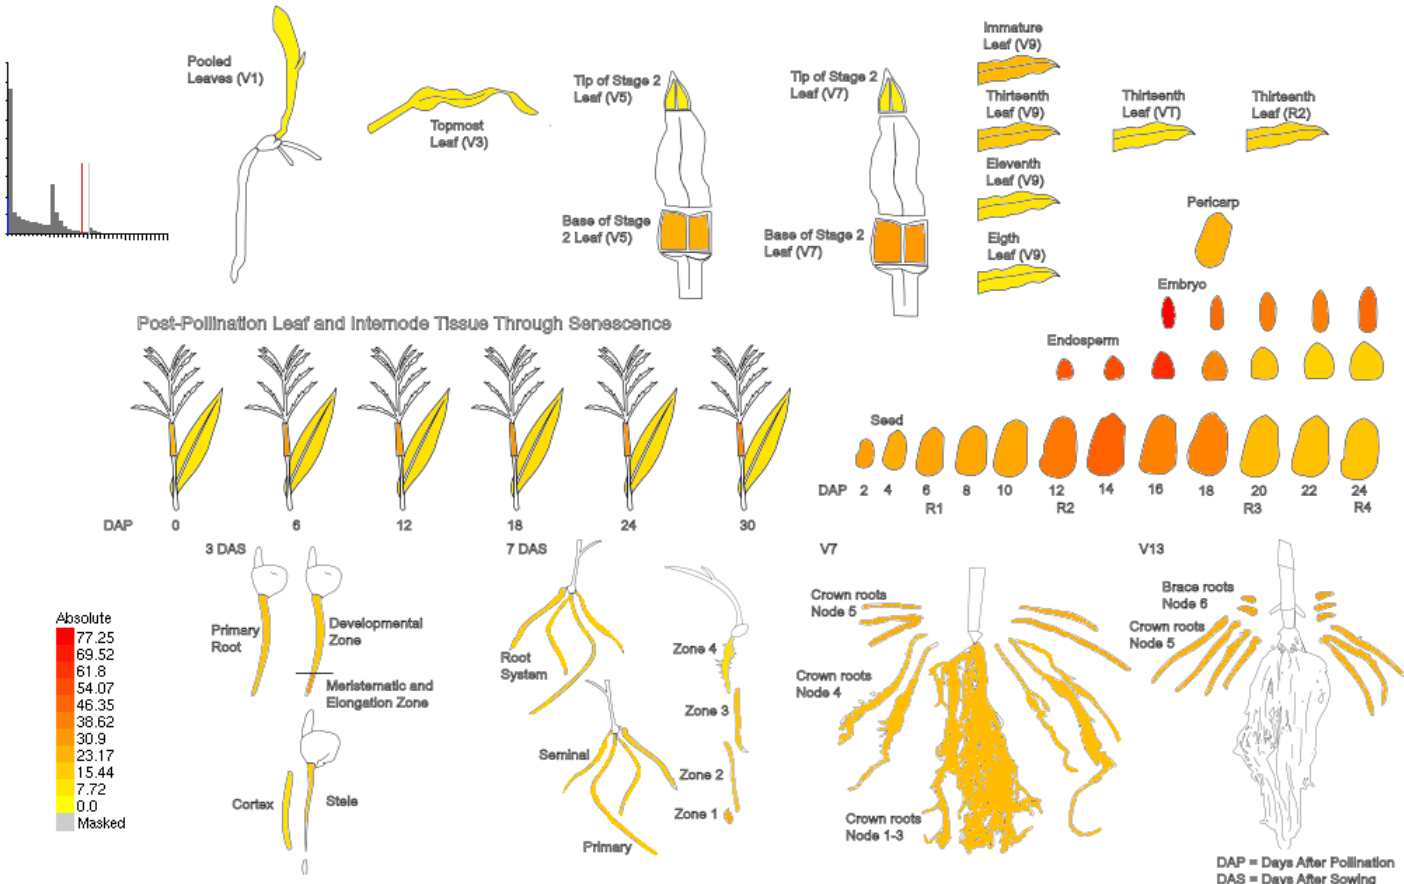

Adapters and low quality bases were removed using Cutadapt (v1.12) (Martin, 2011). All cleaned reads were aligned to the *Z. mays* inbred B73 AGPv4 genome assembly (Jiao *et al.*, 2017) with Bowtie2 (v2.2.3) (Langmead and Salzberg, 2012) and TopHat2 (v2.0.14) (Kim *et al.*, 2013). Fragments Per Kilobase of transcript per Million mapped reads (FPKM) gene expression values for *Z. mays* inbred B73 AGPv4 genes (Jiao *et al.*, 2017) was quantified with Cufflinks (v2.2.1) (Trapnell *et al.*, 2010).

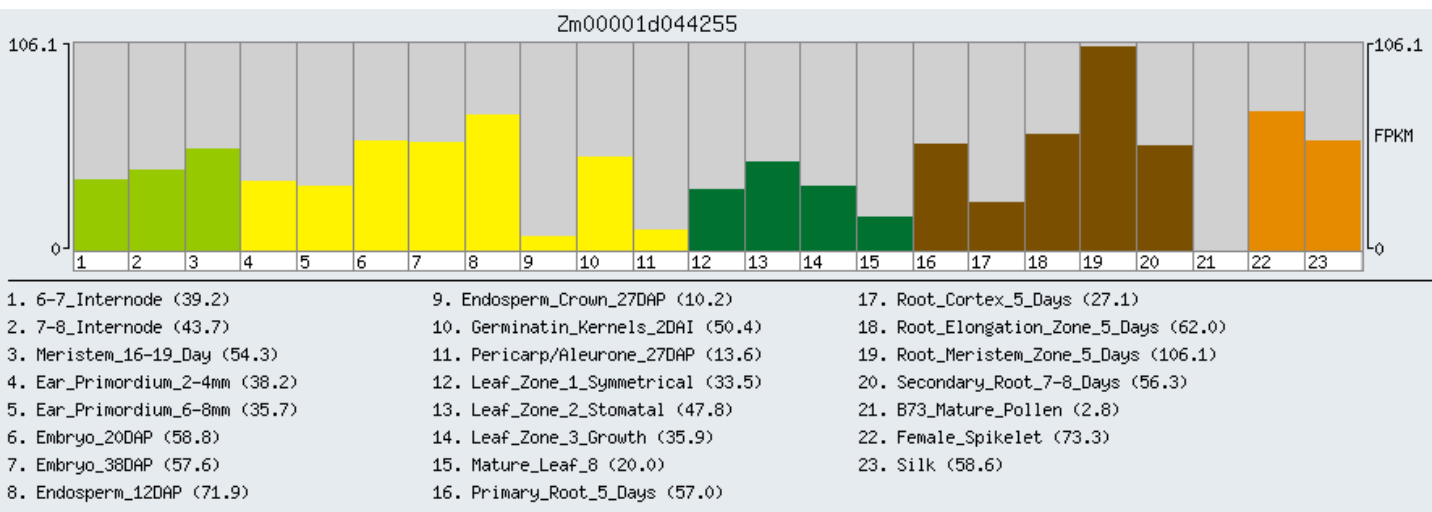

# Zm00001d052047

Maize eFP Browser at bar.utoronto.ca

Zm00001d052047

Zm00001d052047

Winter *et al.*, PLoS One 2(8): e718  
 Stelpflug *et al.*, Plant Genome 9(1).  
 Hoopes *et al.* (2018) Plant J.

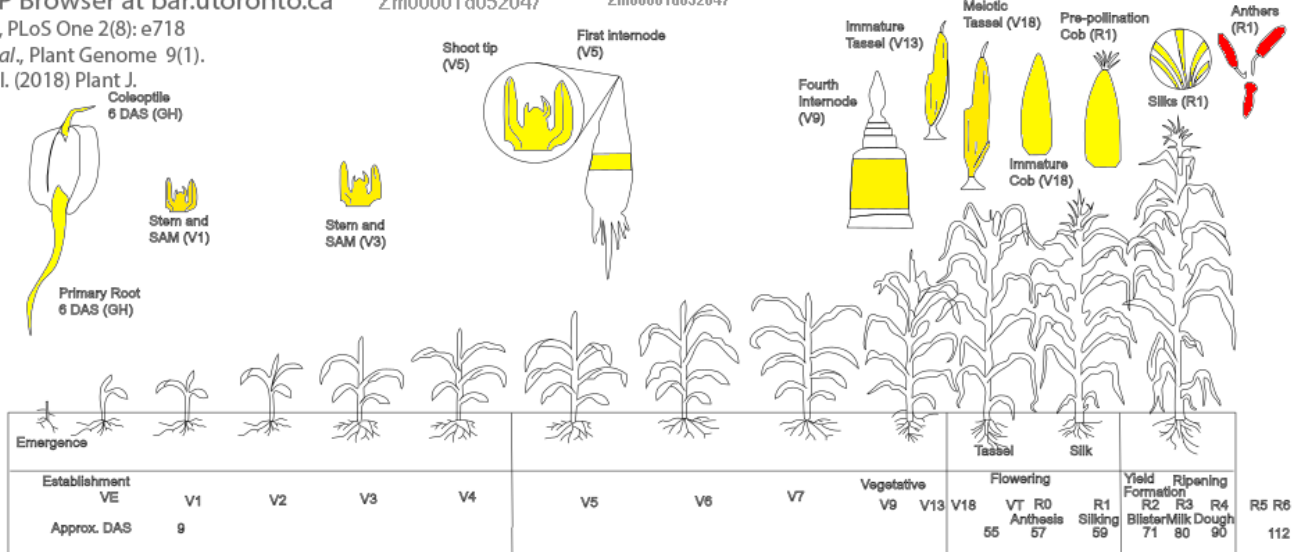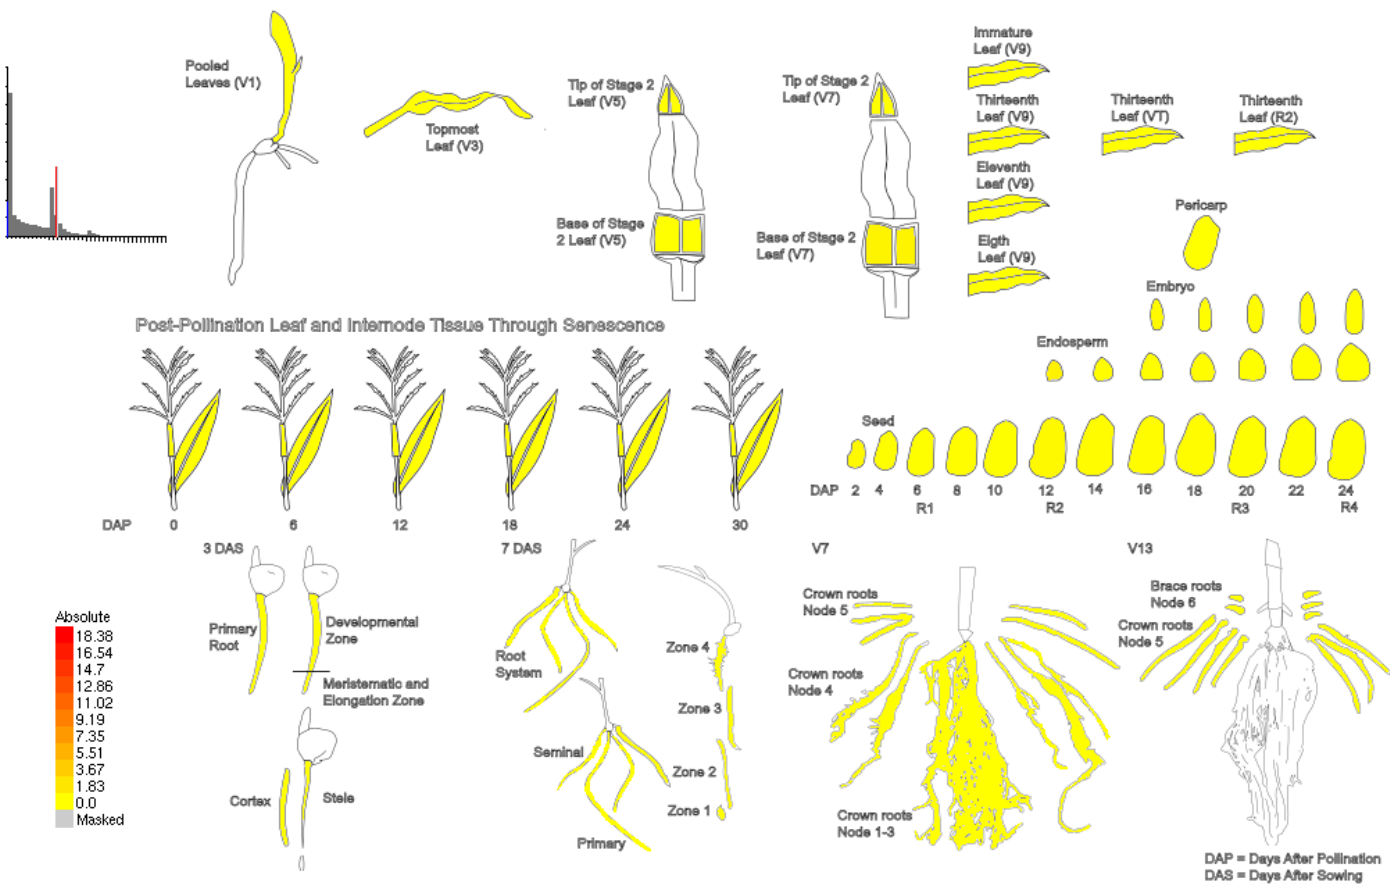

Adapters and low quality bases were removed using Cutadapt (v1.12) (Martin, 2011). All cleaned reads were aligned to the *Z. mays* inbred B73 AGPv4 genome assembly (Jiao *et al.*, 2017) with Bowtie2 (v2.2.3) (Langmead and Salzberg, 2012) and TopHat2 (v2.0.14) (Kim *et al.*, 2013). Fragments Per Kilobase of transcript per Million mapped reads (FPKM) gene expression values for *Z. mays* inbred B73 AGPv4 genes (Jiao *et al.*, 2017) was quantified with Cufflinks (v2.2.1) (Trapnell *et al.*, 2010).

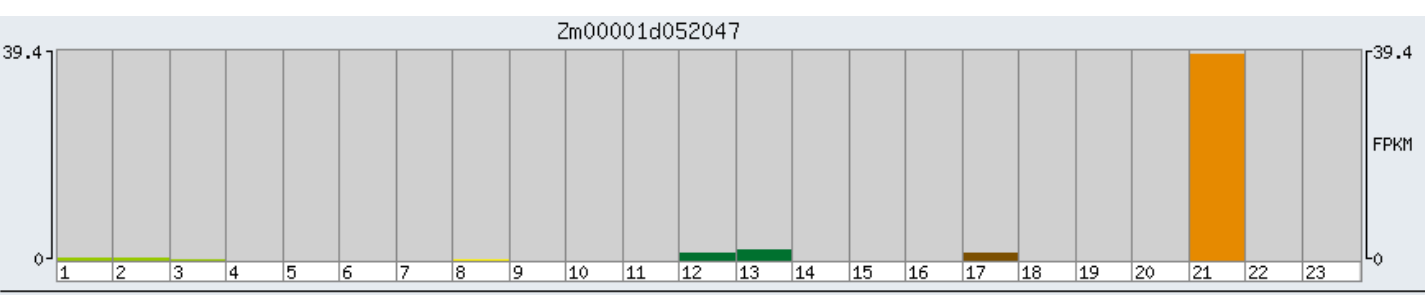

- |                              |                                   |                                      |
|------------------------------|-----------------------------------|--------------------------------------|
| 1. 6-7_Internode (1.6)       | 9. Endosperm_Crown_27DAP (NA)     | 17. Root_Cortex_5_Days (2.4)         |
| 2. 7-8_Internode (1.6)       | 10. Germinatin_Kernels_2DAI (NA)  | 18. Root_Elongation_Zone_5_Days (NA) |
| 3. Meristem_16-19_Day (1.3)  | 11. Pericarp/Aleurone_27DAP (NA)  | 19. Root_Meristem_Zone_5_Days (NA)   |
| 4. Ear_Primordium_2-4mm (NA) | 12. Leaf_Zone_1_Symmetrical (2.6) | 20. Secondary_Root_7-8_Days (NA)     |
| 5. Ear_Primordium_6-8mm (NA) | 13. Leaf_Zone_2_Stomatal (3.2)    | 21. B73_Mature_Pollen (39.4)         |
| 6. Embryo_20DAP (NA)         | 14. Leaf_Zone_3_Growth (NA)       | 22. Female_Spikelet (NA)             |
| 7. Embryo_38DAP (NA)         | 15. Mature_Leaf_8 (NA)            | 23. Silk (NA)                        |
| 8. Endosperm_12DAP (1.1)     | 16. Primary_Root_5_Days (NA)      |                                      |

# Zm00001d052416

Maize eFP Browser at bar.utoronto.ca

Zm00001d052416

Zm00001d052416

Winter et al., PLoS One 2(8): e718  
 Stelpflug et al., Plant Genome 9(1).  
 Hoopes et al. (2018) Plant J.

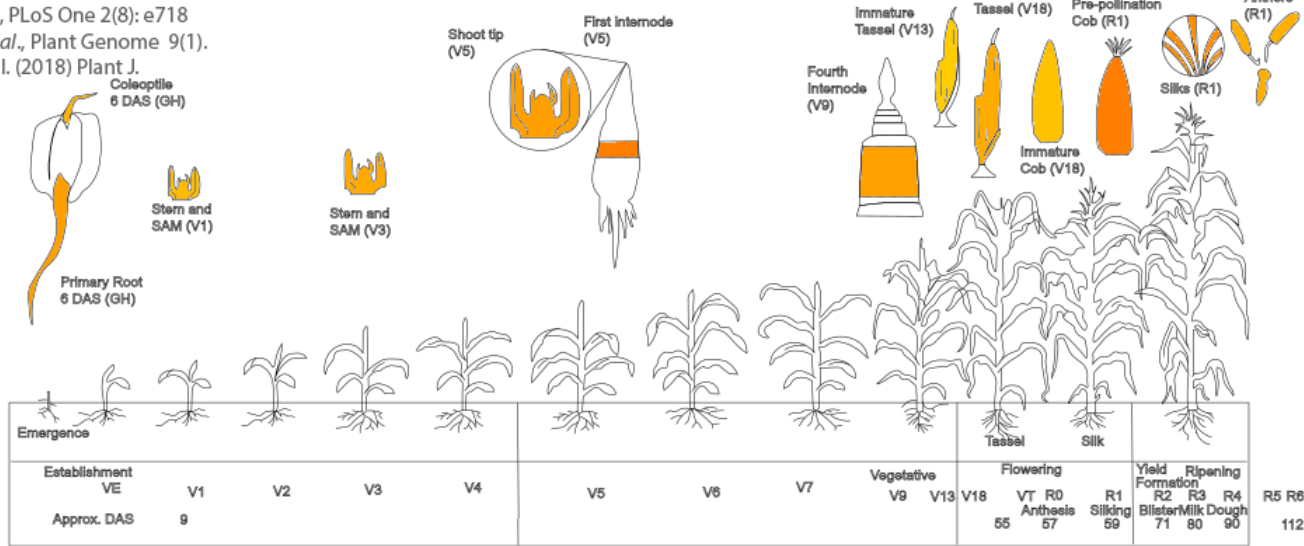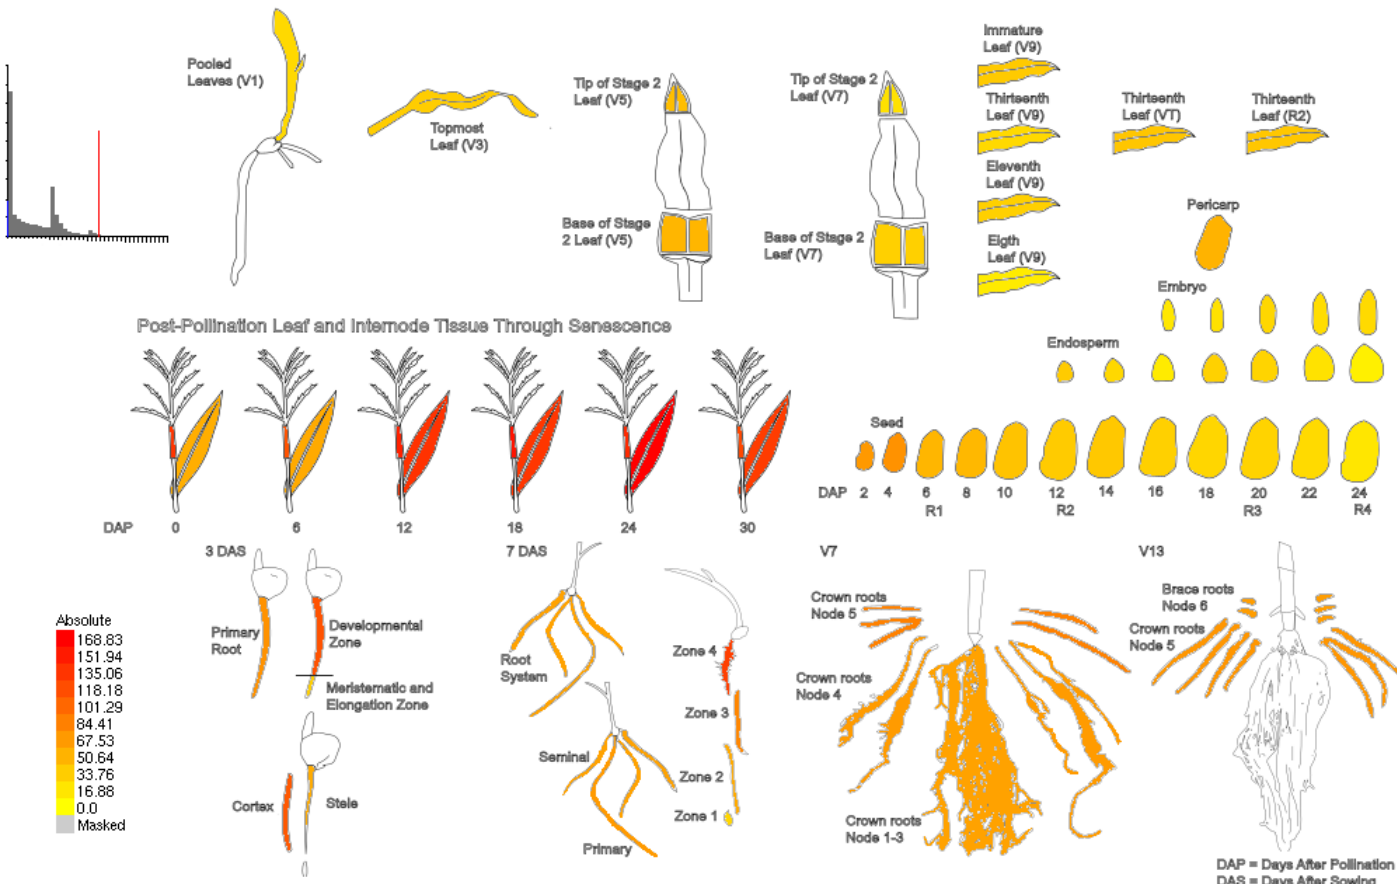

Adapters and low quality bases were removed using Cutadapt (v1.12) (Martin, 2011). All cleaned reads were aligned to the Z. mays inbred B73 AGPv4 genome assembly (Jiao et al., 2017) with Bowtie2 (v2.2.3) (Langmead and Salzberg, 2012) and TopHat2 (v2.0.14) (Kim et al., 2013). Fragments Per Kilobase of transcript per Million mapped reads (FPKM) gene expression values for Z. mays inbred B73 AGPv4 genes (Jiao et al., 2017) was quantified with Cufflinks (v2.2.1) (Trapnell et al., 2010).

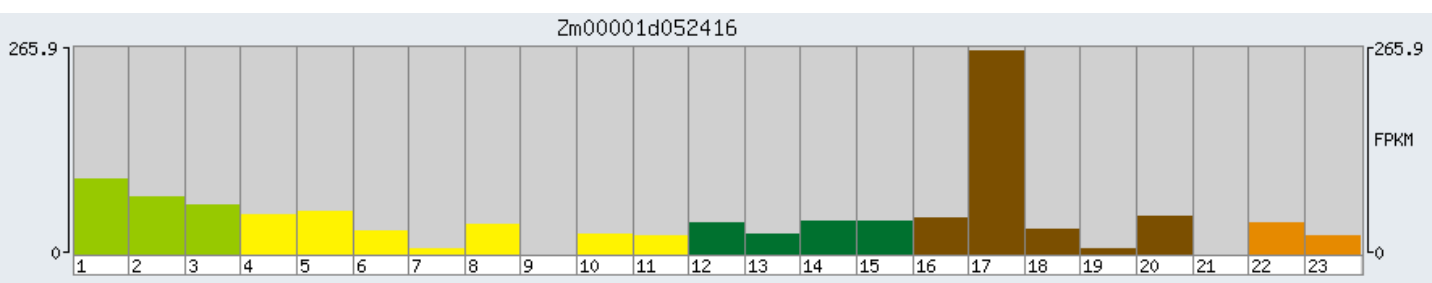

- |                              |                                    |                                        |
|------------------------------|------------------------------------|----------------------------------------|
| 1. 6-7_Internode (104.2)     | 9. Endosperm_Crown_27DAP (1.8)     | 17. Root_Cortex_5_Days (265.9)         |
| 2. 7-8_Internode (79.7)      | 10. Germinatin_Kernels_2DAI (32.6) | 18. Root_Elongation_Zone_5_Days (40.0) |
| 3. Meristem_16-19_Day (70.6) | 11. Pericarp/Aleurone_27DAP (31.6) | 19. Root_Meristem_Zone_5_Days (14.7)   |
| 4. Ear_Primary_2-4mm (57.9)  | 12. Leaf_Zone_1_Symmetrical (47.9) | 20. Secondary_Root_7-8_Days (56.9)     |
| 5. Ear_Primary_6-8mm (61.2)  | 13. Leaf_Zone_2_Stomatal (33.2)    | 21. B73_Mature_Pollen (NA)             |
| 6. Embryo_20DAP (36.3)       | 14. Leaf_Zone_3_Growth (50.5)      | 22. Female_Spikelet (46.7)             |
| 7. Embryo_38DAP (15.2)       | 15. Mature_Leaf_8 (50.1)           | 23. Silk (31.8)                        |
| 8. Endosperm_12DAP (46.4)    | 16. Primary_Root_5_Days (54.3)     |                                        |



# Zm00001d053442

Maize eFP Browser at bar.utoronto.ca

Zm00001d053442

Zm00001d053442

Winter *et al.*, PLoS One 2(8): e718  
 Stelpflug *et al.*, Plant Genome 9(1).  
 Hoopes *et al.* (2018) Plant J.

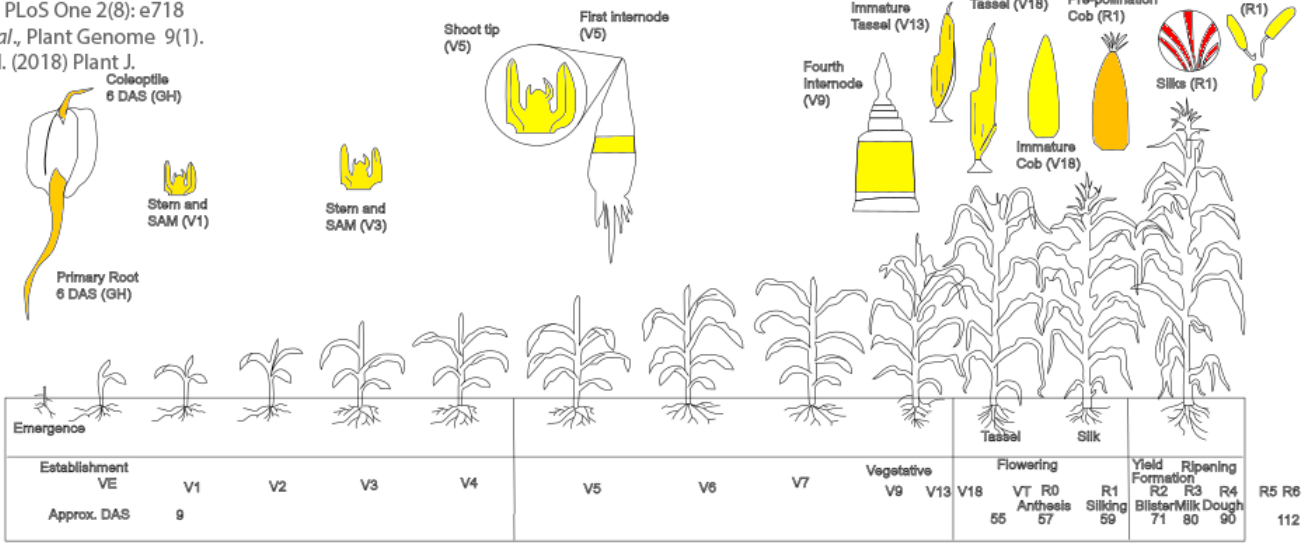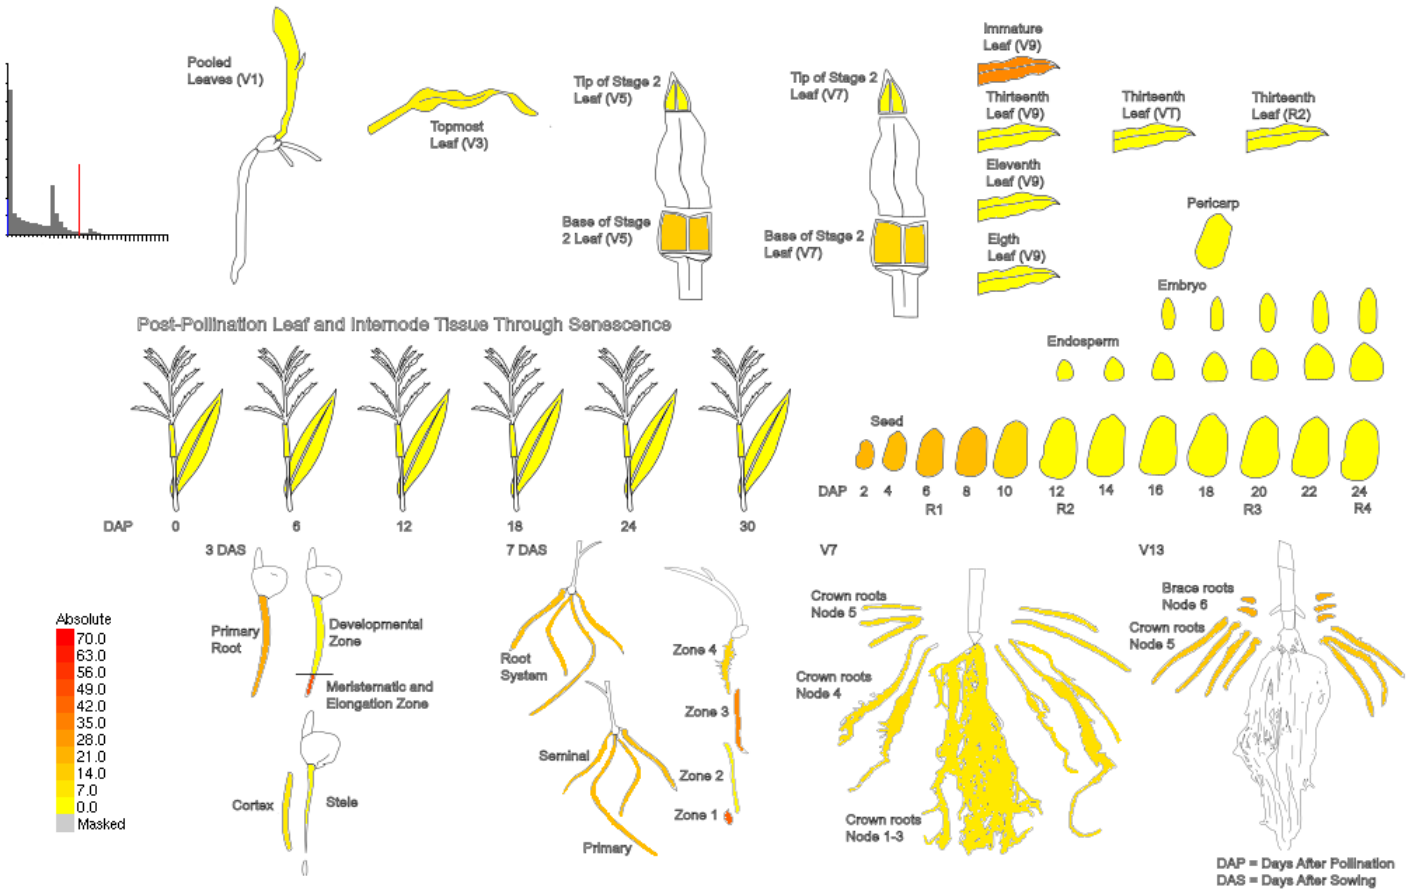

Adapters and low quality bases were removed using Cutadapt (v1.12) (Martin, 2011). All cleaned reads were aligned to the Z. mays inbred B73 AGPv4 genome assembly (Jiao *et al.*, 2017) with Bowtie2 (v2.2.3) (Langmead and Salzberg, 2012) and TopHat2 (v2.0.14) (Kim *et al.*, 2013). Fragments Per Kilobase of transcript per Million mapped reads (FPKM) gene expression values for Z. mays inbred B73 AGPv4 genes (Jiao *et al.*, 2017) was quantified with Cufflinks (v2.2.1) (Trapnell *et al.*, 2010).

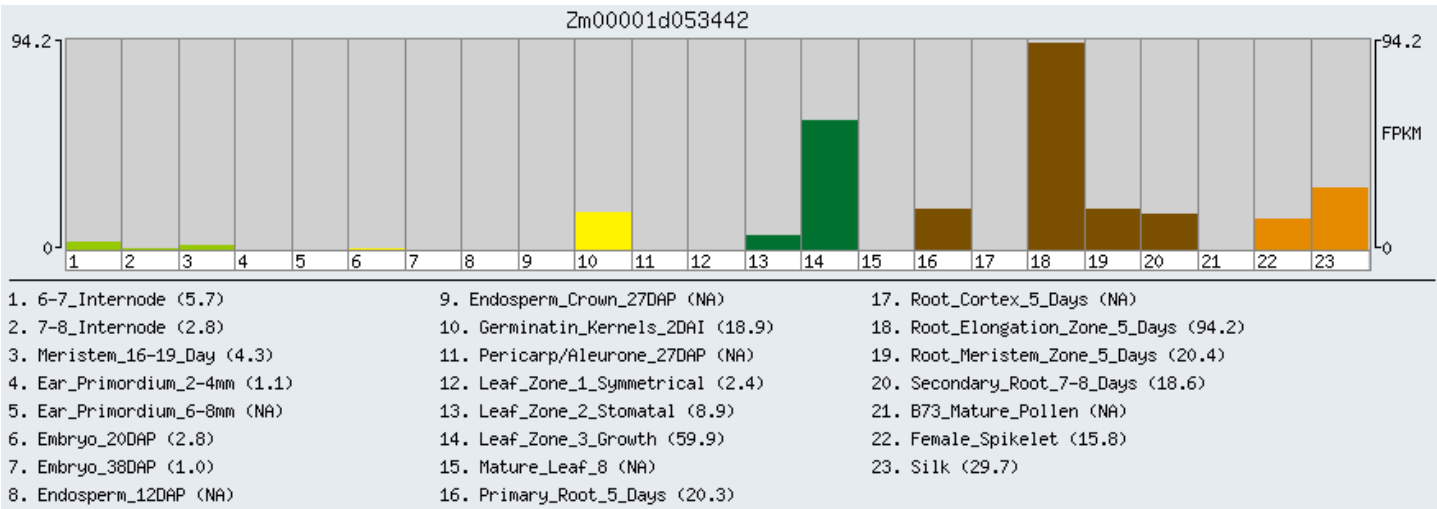





# Zm00001d053716

Maize eFP Browser at bar.utoronto.ca

Zm00001d053716

Zm00001d053716

Winter *et al.*, PLoS One 2(8): e718  
 Stelpflug *et al.*, Plant Genome 9(1).  
 Hoopes *et al.* (2018) Plant J.

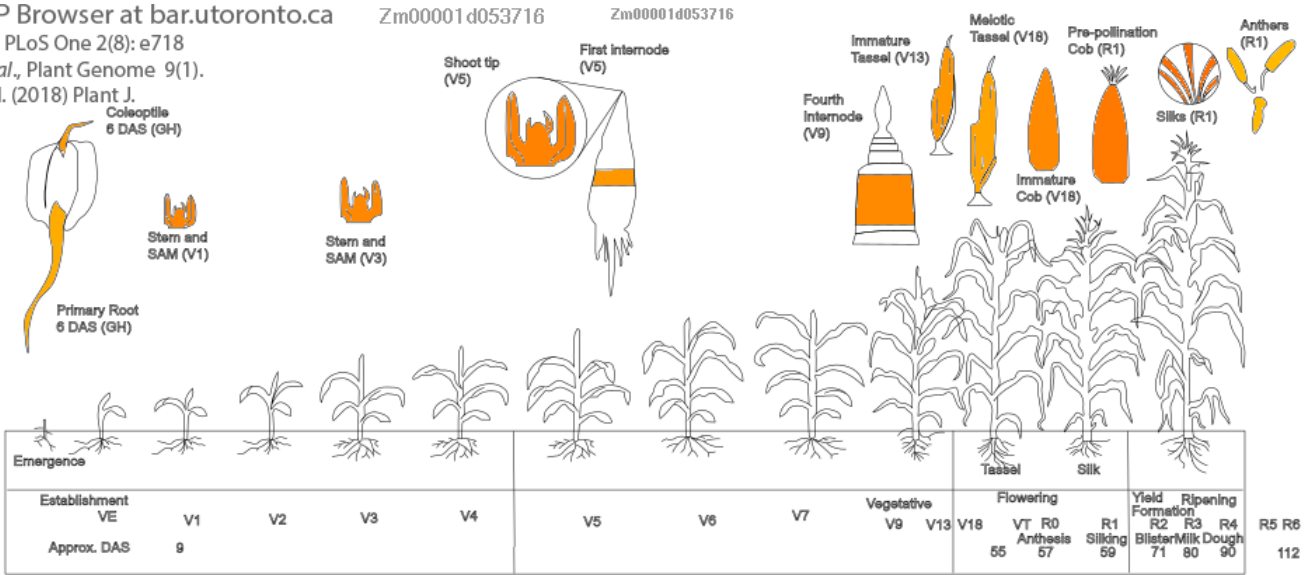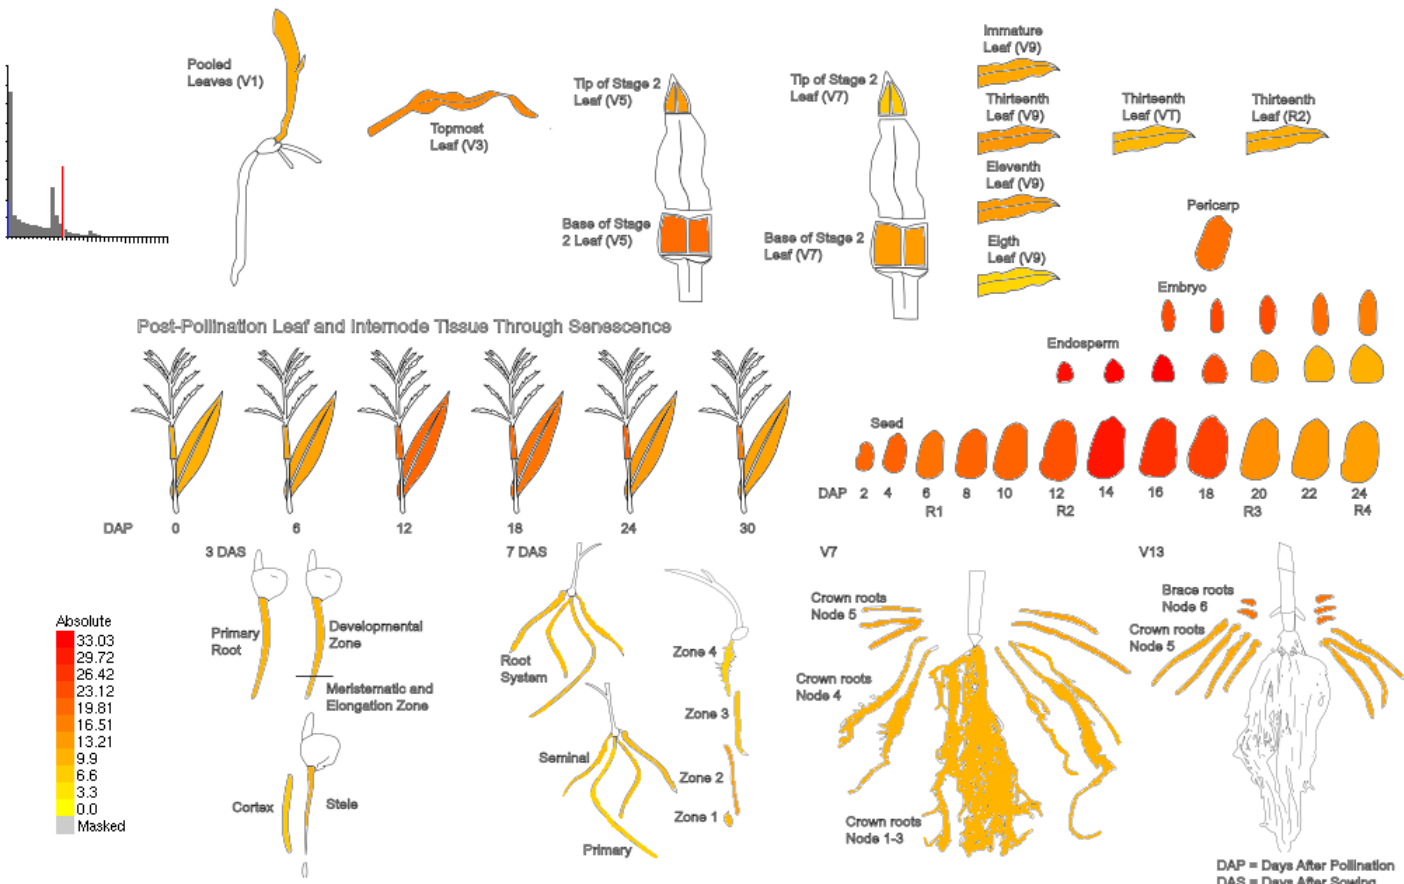

Adapters and low quality bases were removed using Cutadapt (v1.12) (Martin, 2011). All cleaned reads were aligned to the Z. mays inbred B73 AGPv4 genome assembly (Jiao *et al.*, 2017) with Bowtie2 (v2.2.3) (Langmead and Salzberg, 2012) and TopHat2 (v2.0.14) (Kim *et al.*, 2013). Fragments Per Kilobase of transcript per Million mapped reads (FPKM) gene expression values for Z. mays inbred B73 AGPv4 genes (Jiao *et al.*, 2017) was quantified with Cufflinks (v2.2.1) (Trapnell *et al.*, 2010).

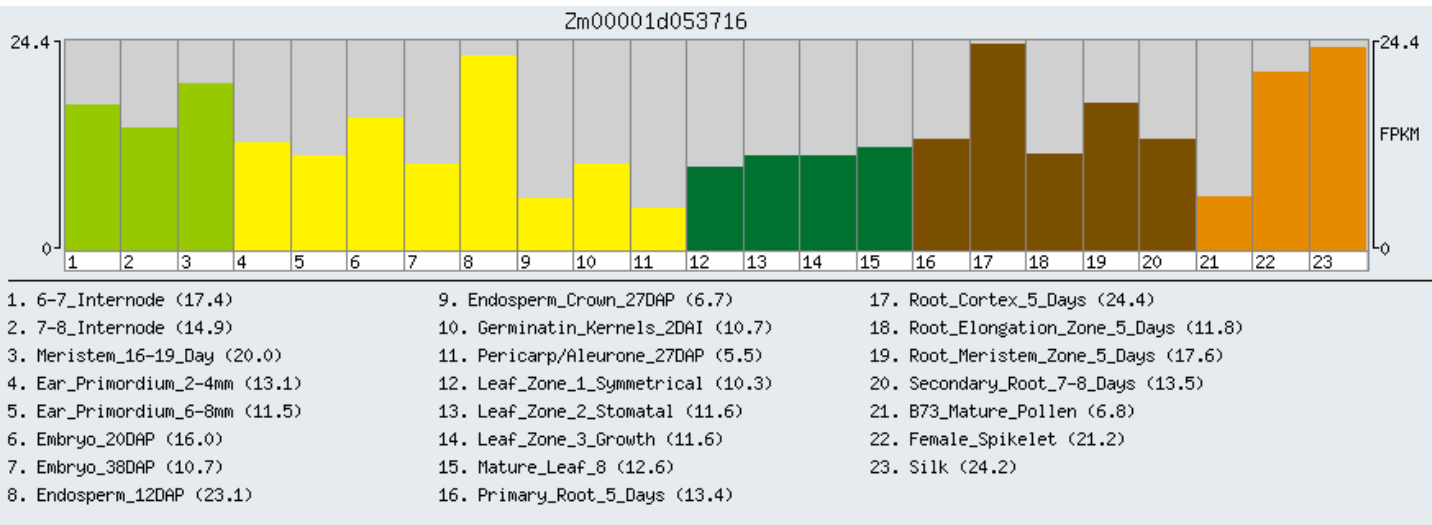

Supplement: TPJ-107-1056-s022.pdf [file TPJ-107-1056-s022.pdf]
