# Supplementary figures and images for: A forward genetics approach integrating genome‐wide association study and expression quantitative trait locus mapping to dissect leaf development in maize (Zea mays)
Source: PubMed Central journal article supplement — Plant J. 2021 Jul 8;107(4):1056–71. doi: 10.1111/tpj.15364 (PMC8519057; doi:10.1111/tpj.15364), 2021-07-08

### Scale Free Topology Model Fit

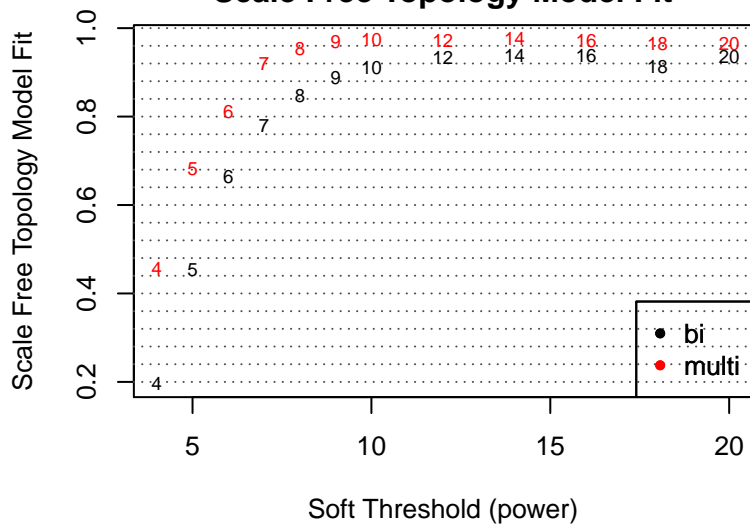

### Median connectivity

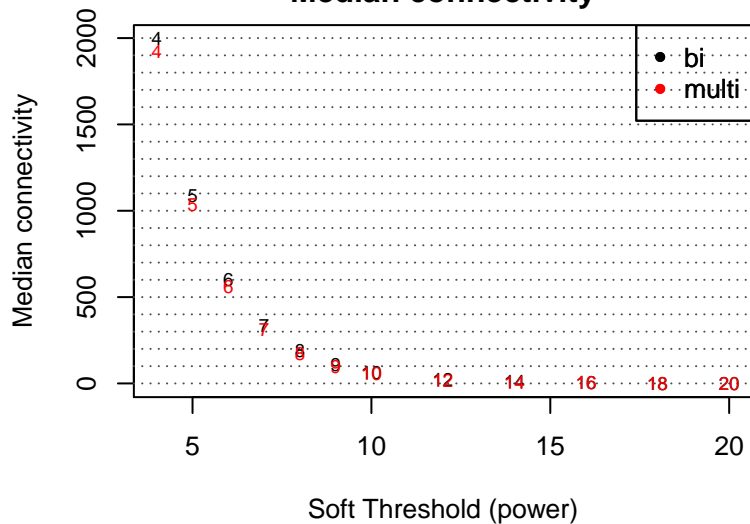

### Mean connectivity

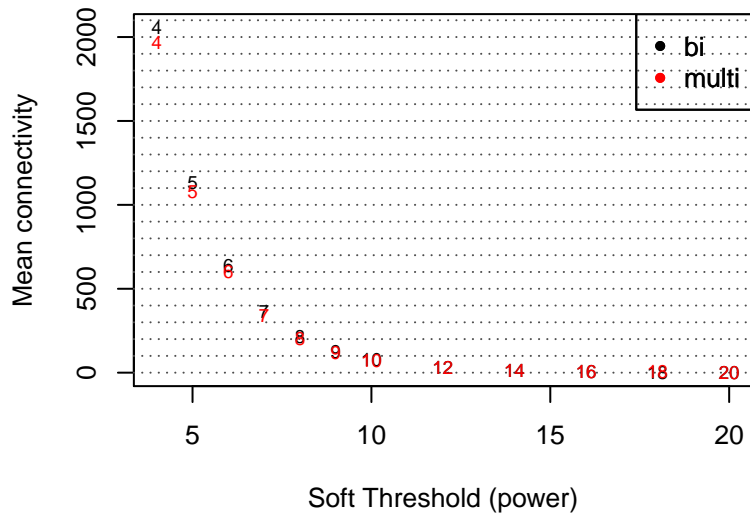

### Max connectivity

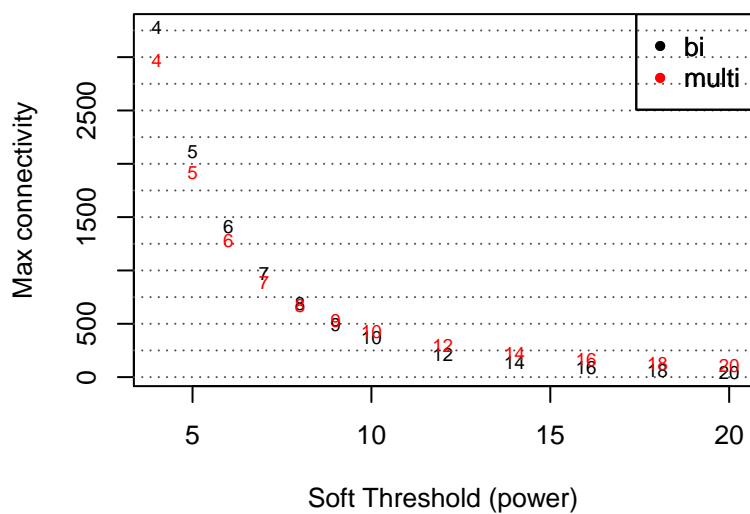

Supplement: TPJ-107-1056-s006.pdf [file TPJ-107-1056-s006.pdf]

### QQ-plot with 1 PC covariate

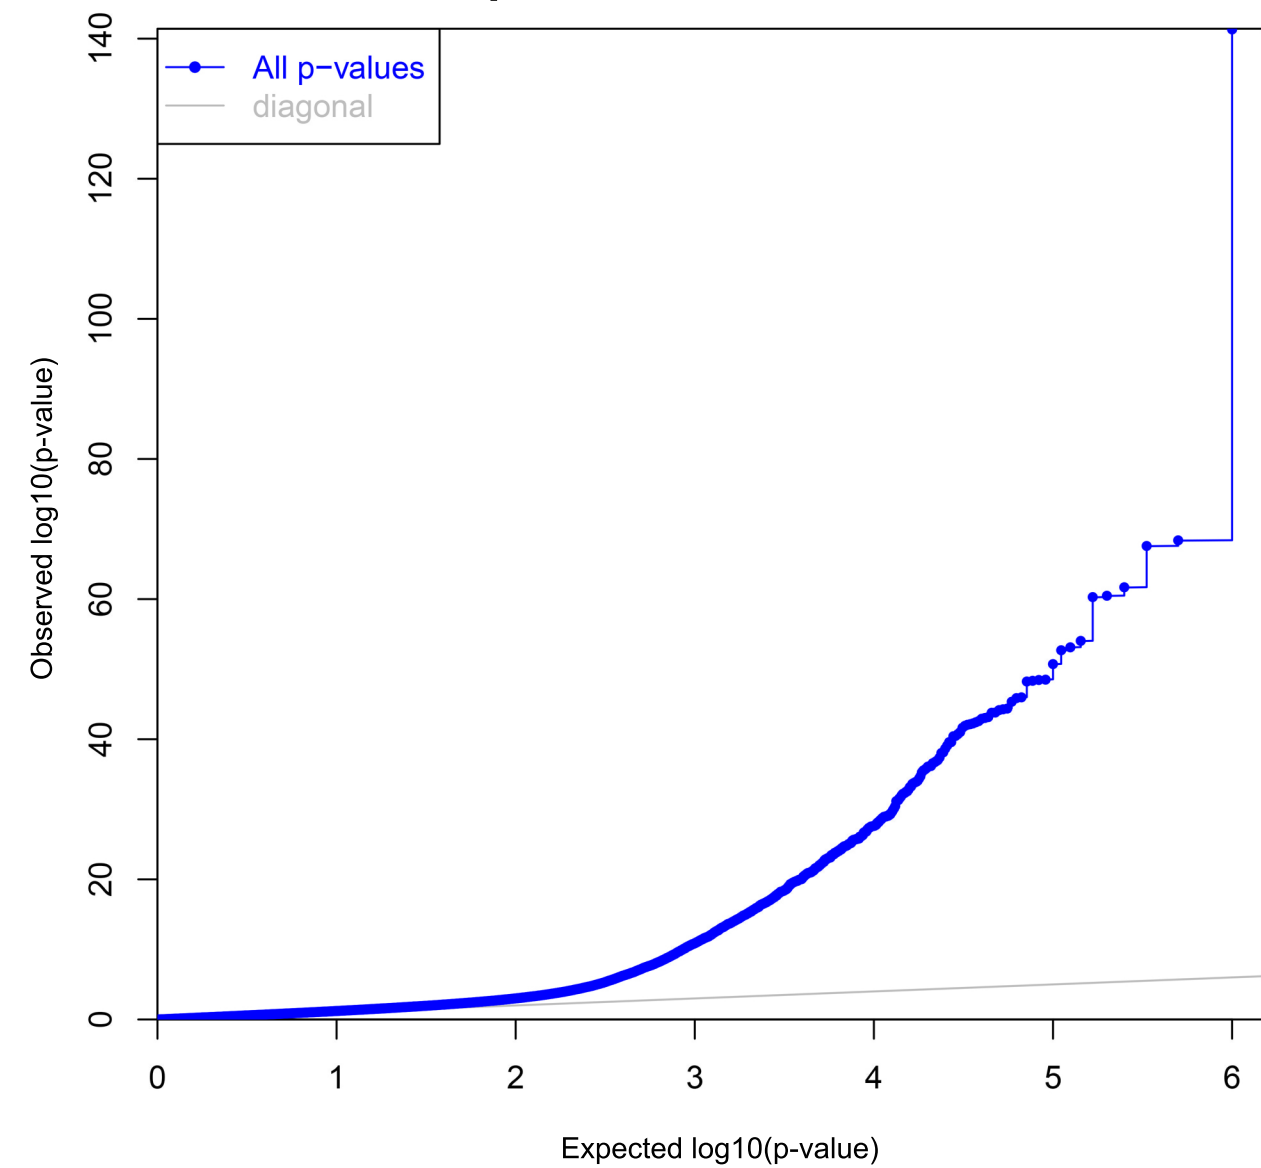

### QQ-plot with 10 PC covariates

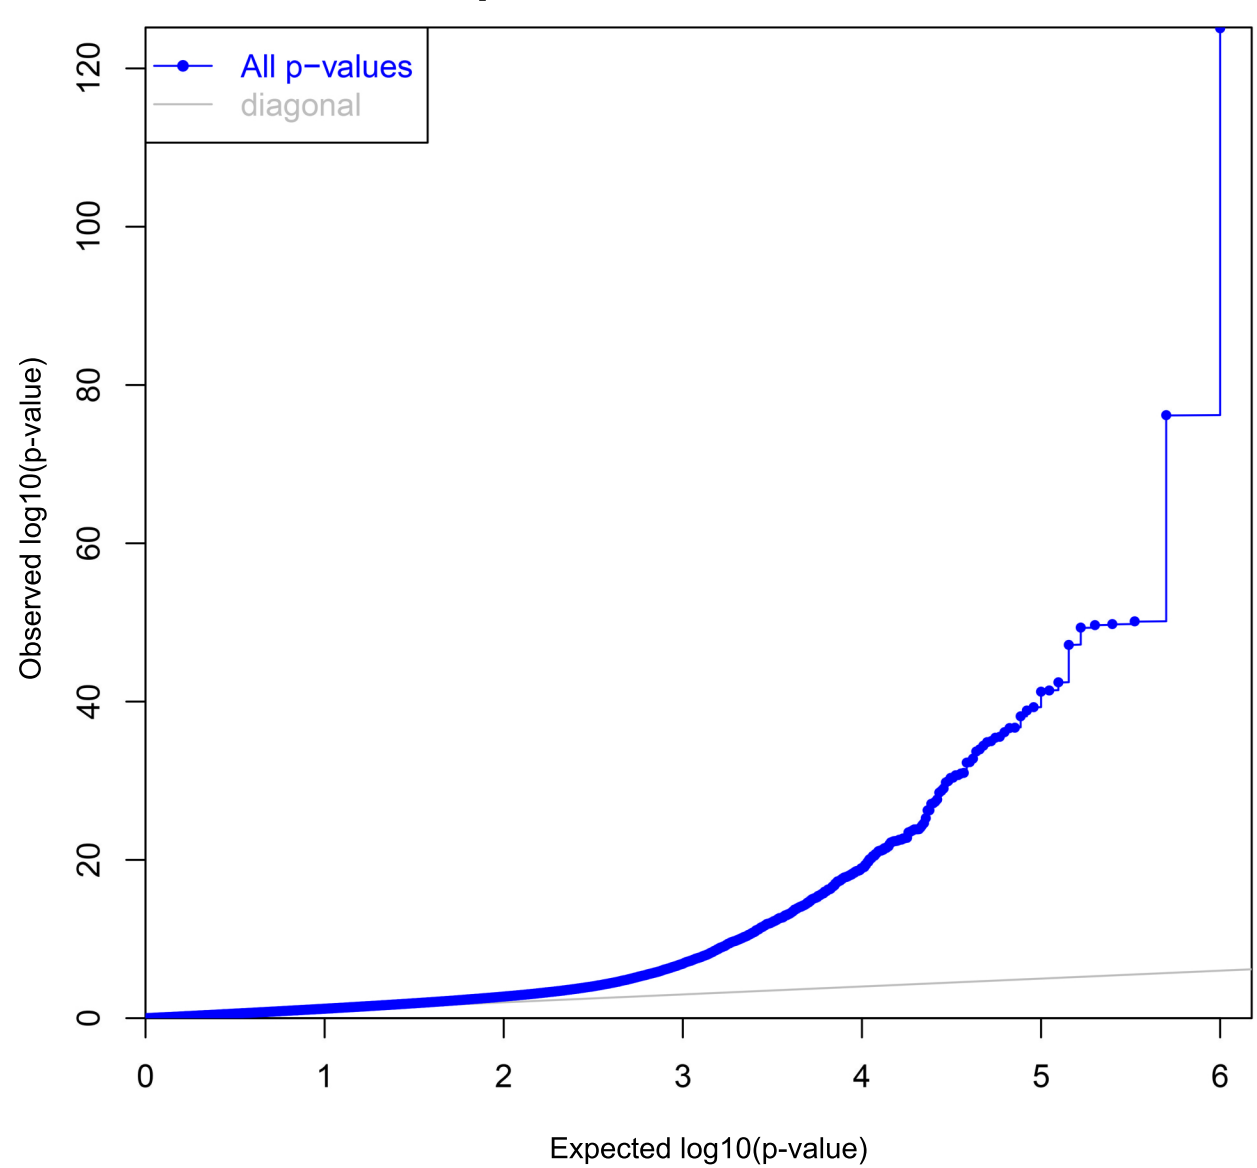

### QQ-plot with 20 PC covariates

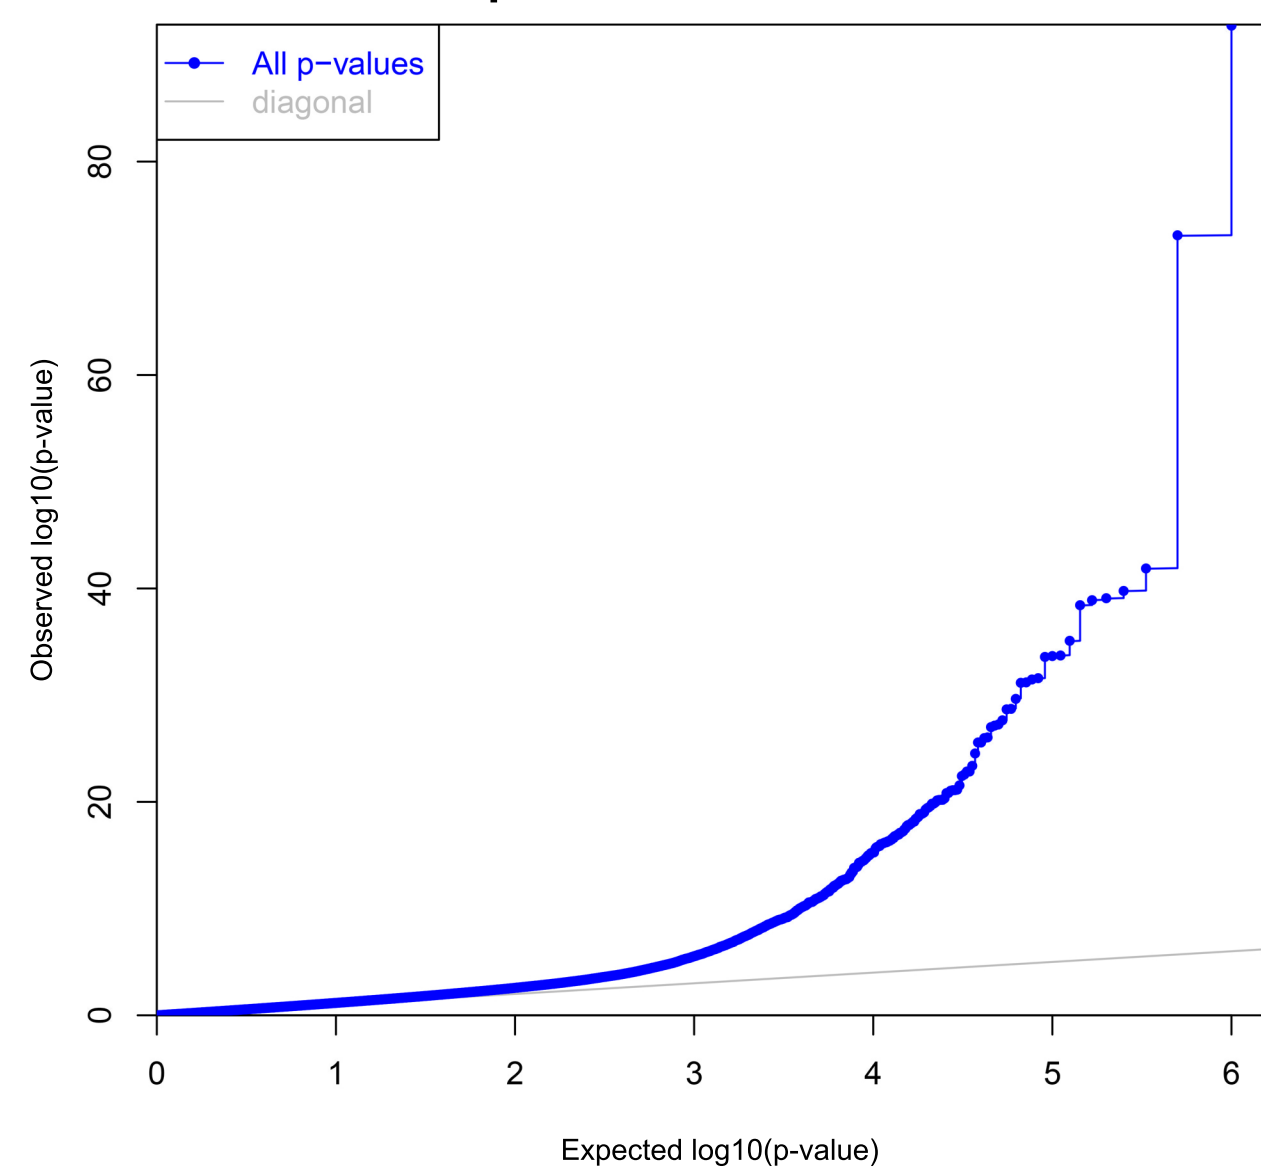

Supplement: TPJ-107-1056-s020.pdf [file TPJ-107-1056-s020.pdf]

**a** Number of eQTL [genes]

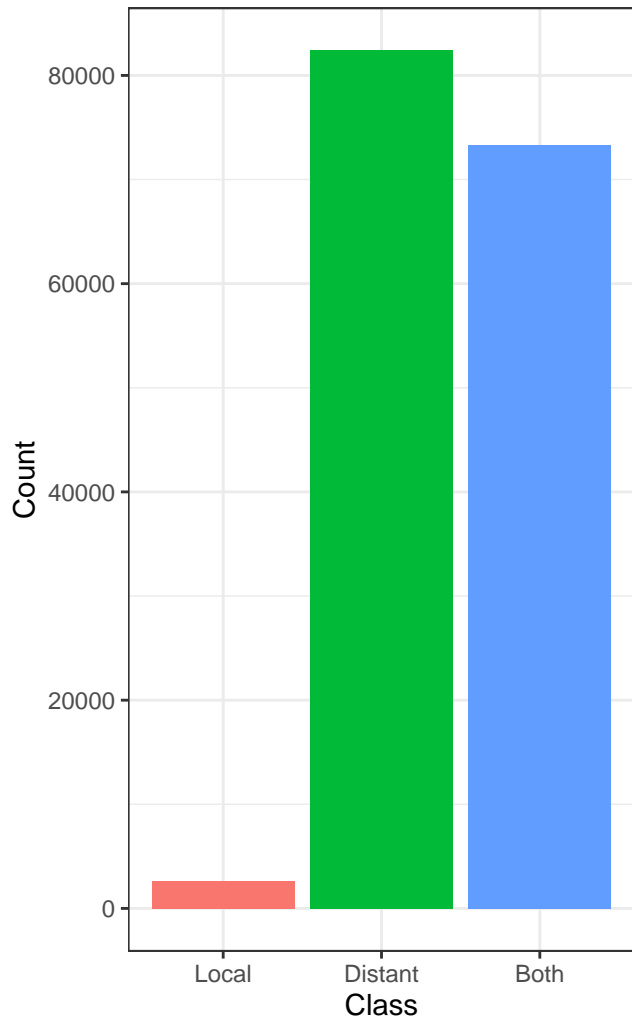

**b** Number of SNPs controlling eQTL genes

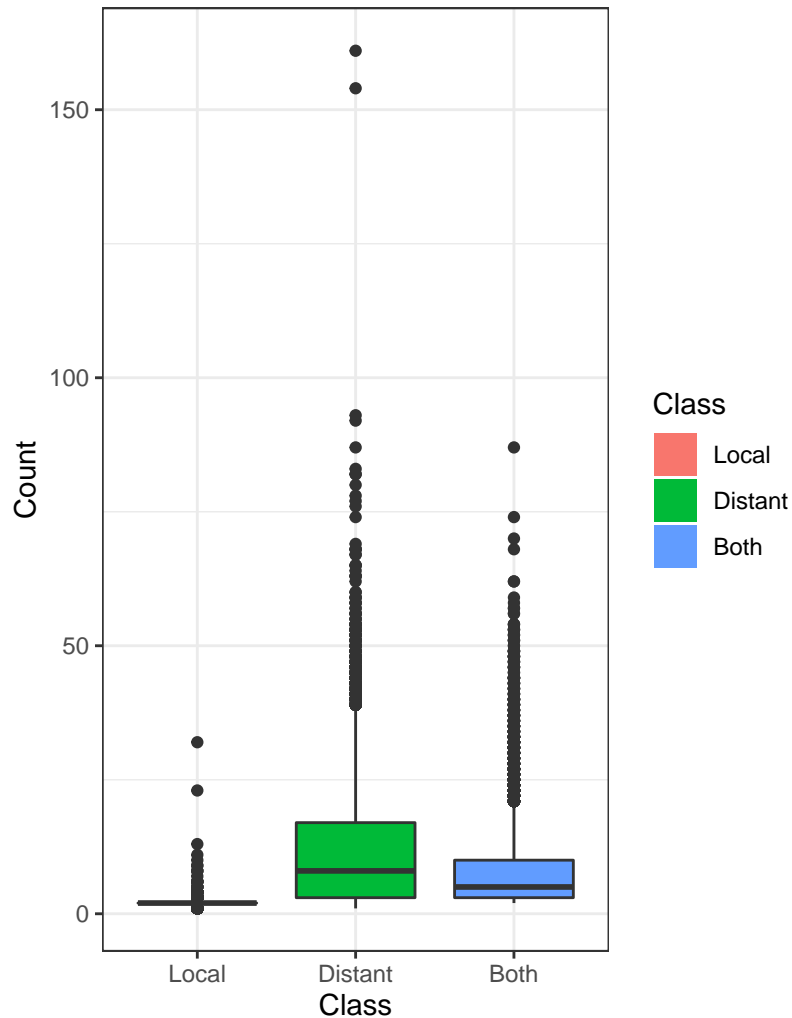

Supplement: TPJ-107-1056-s026.pdf [file TPJ-107-1056-s026.pdf]

# Consensus gene dendrogram and module colors

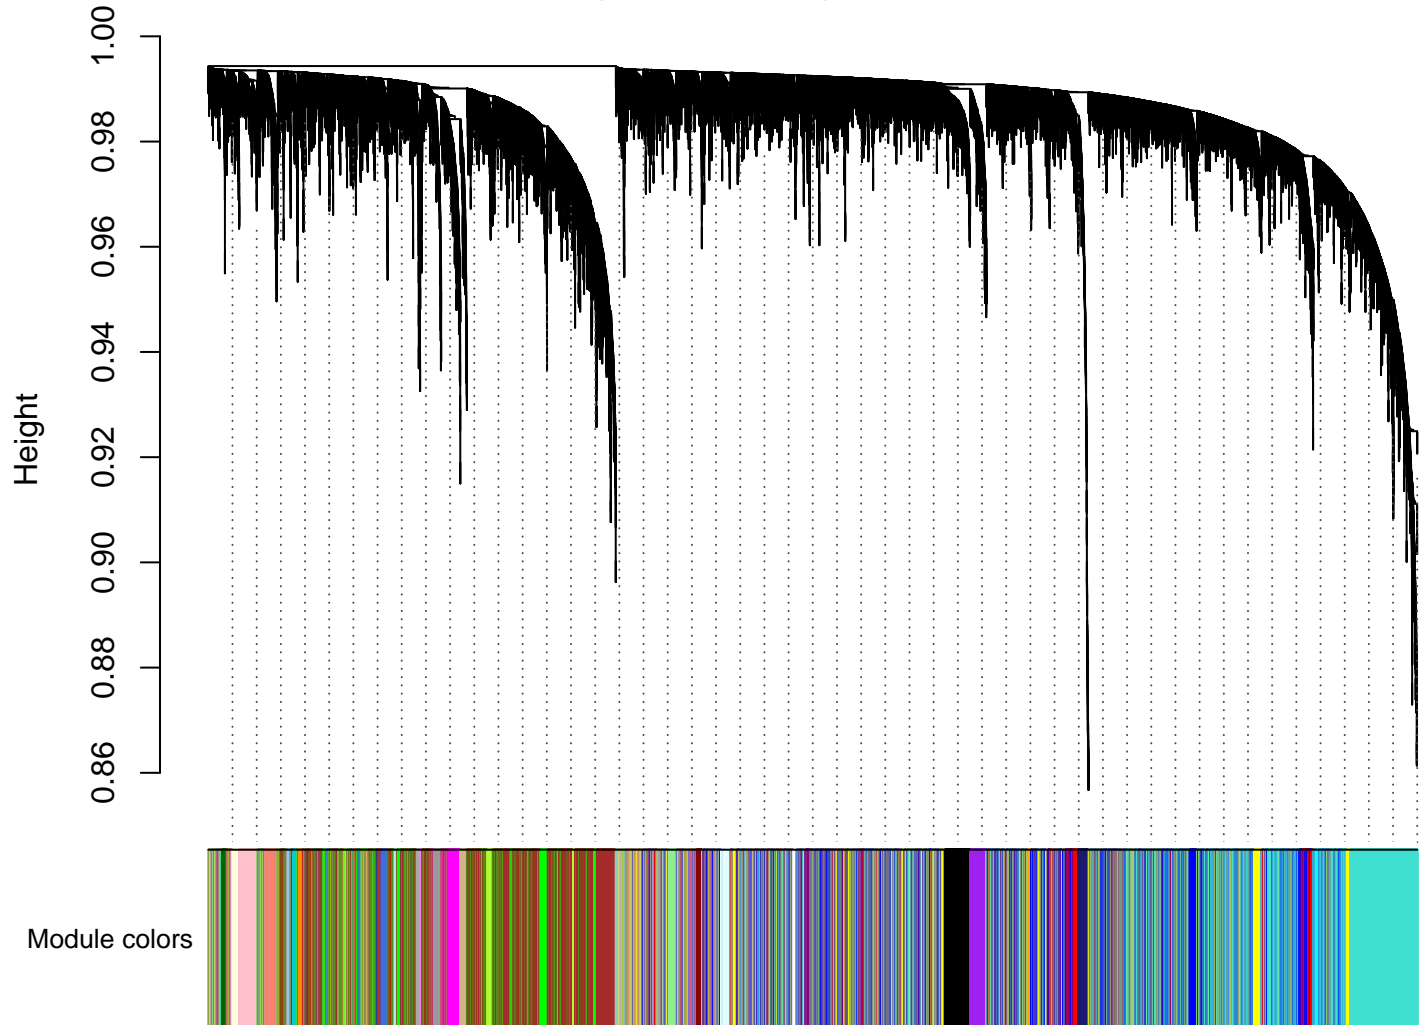

Supplement: TPJ-107-1056-s027.pdf [file TPJ-107-1056-s027.pdf]

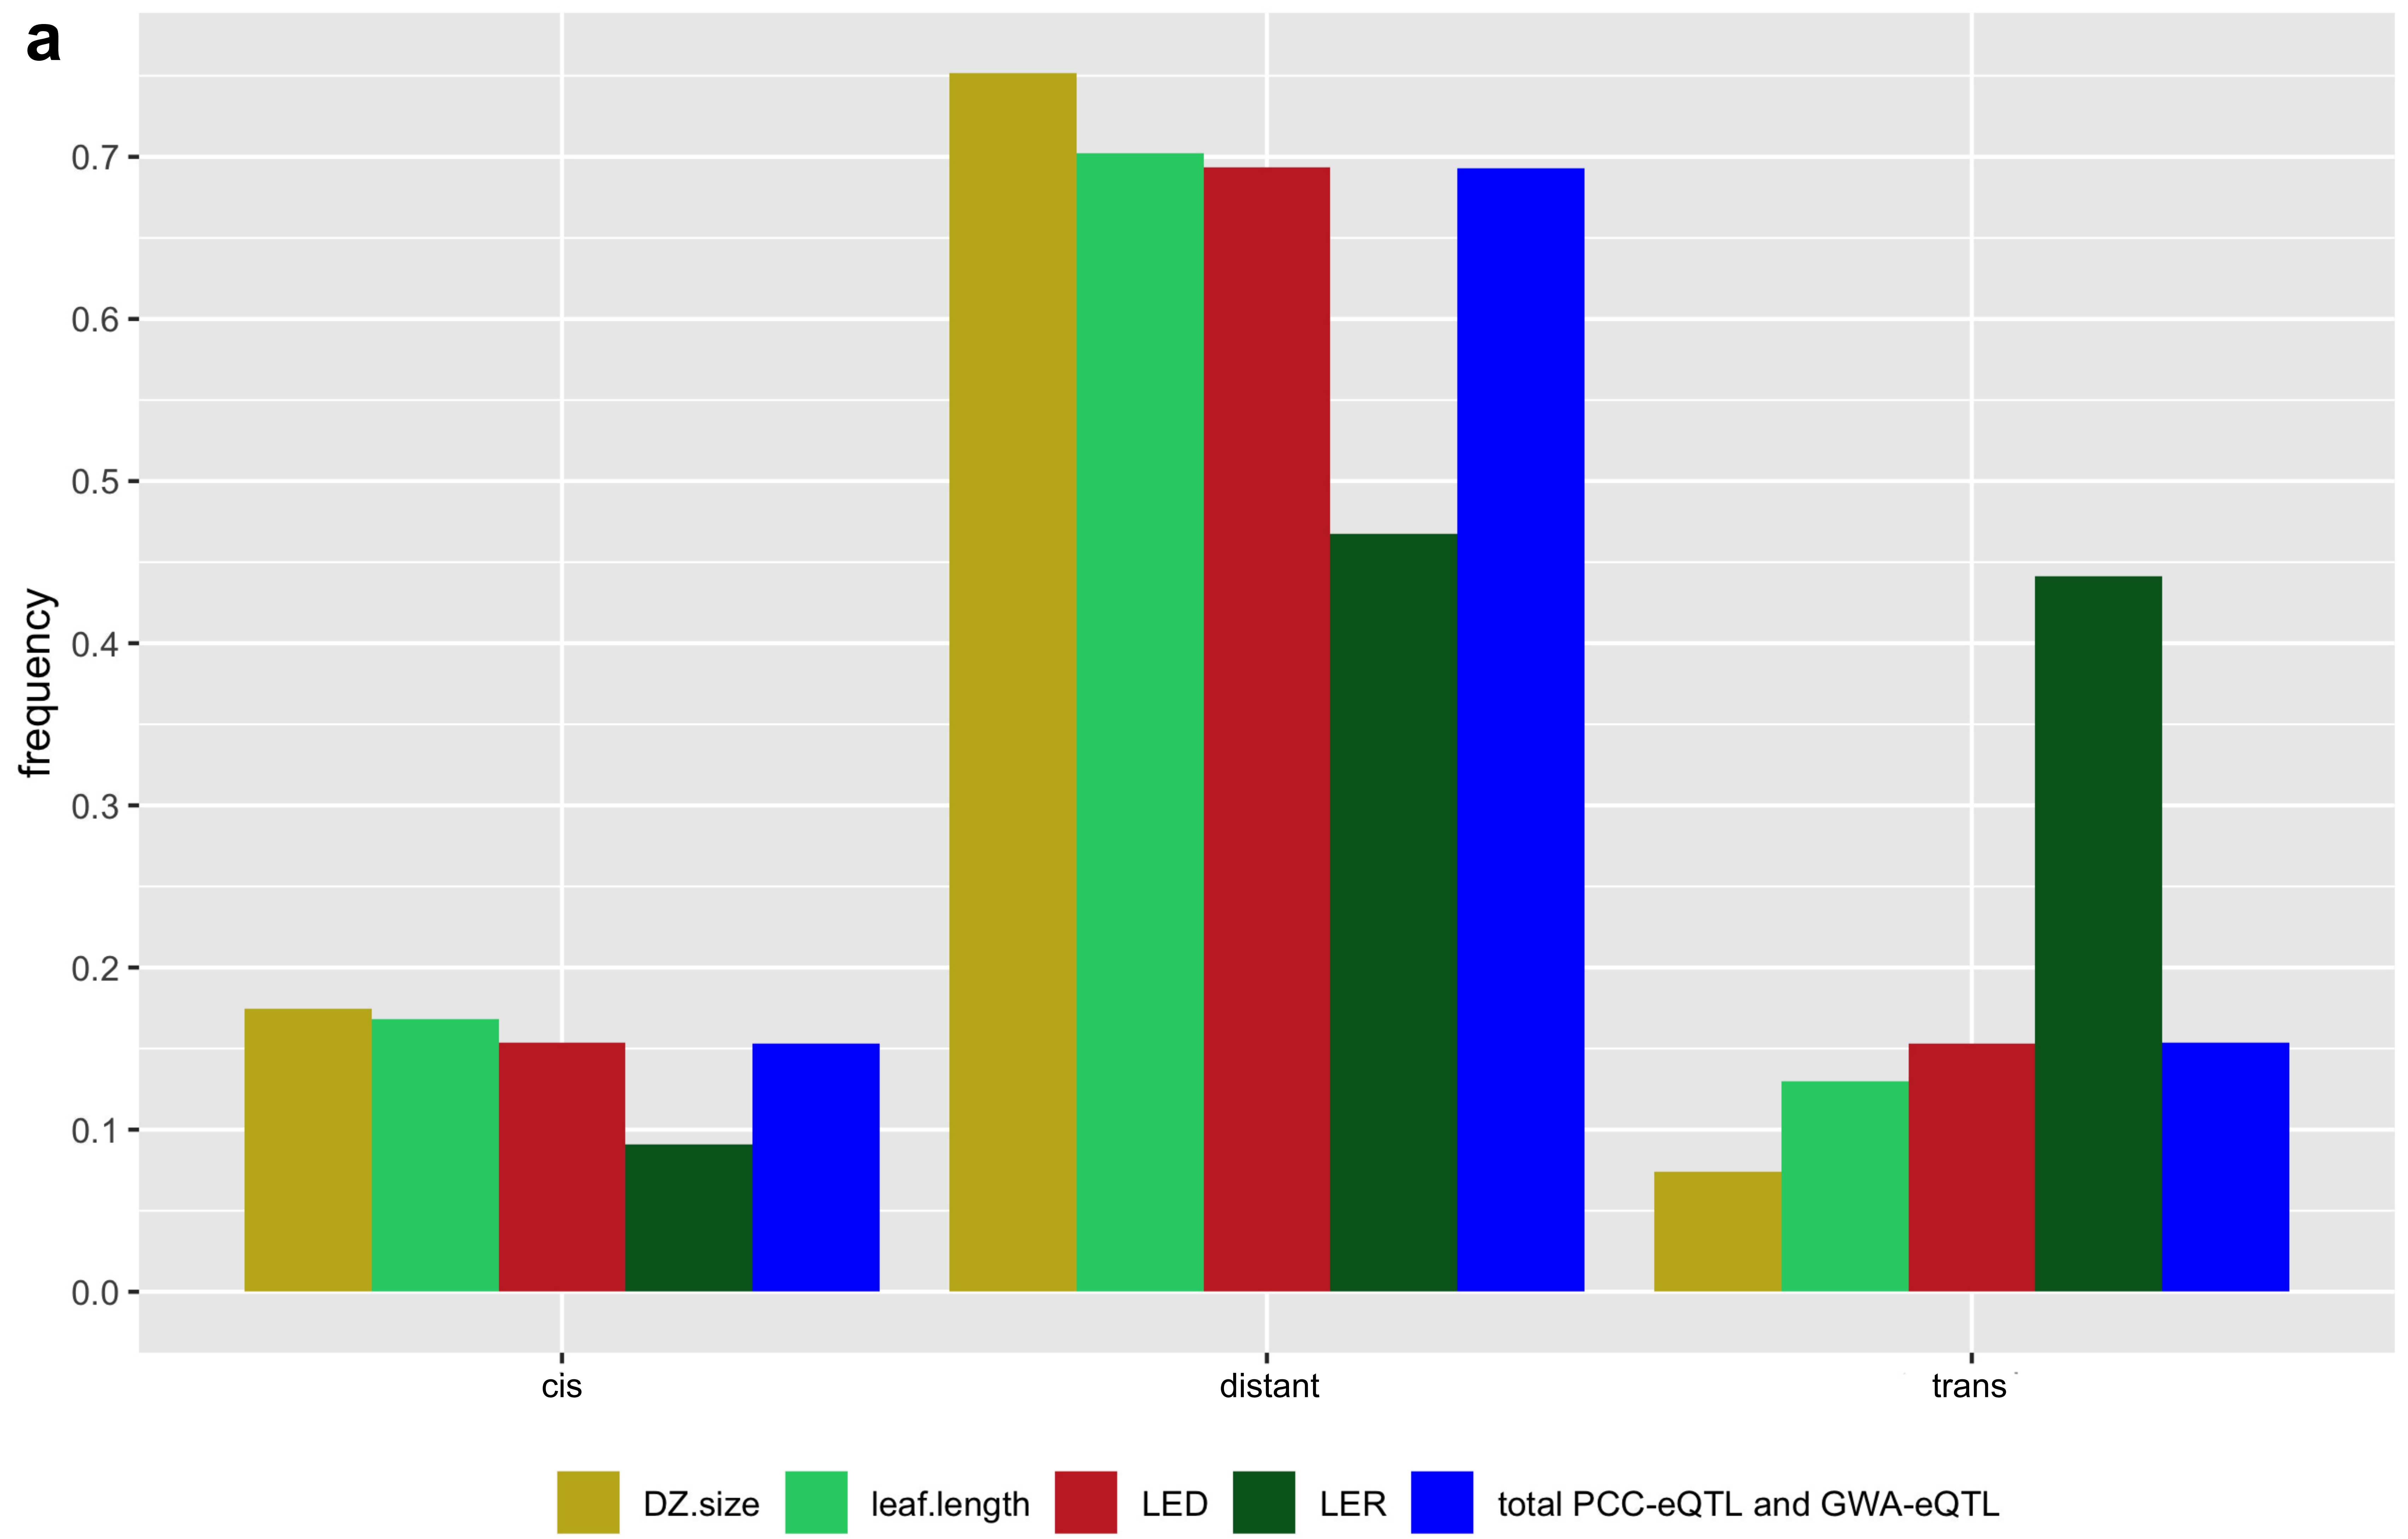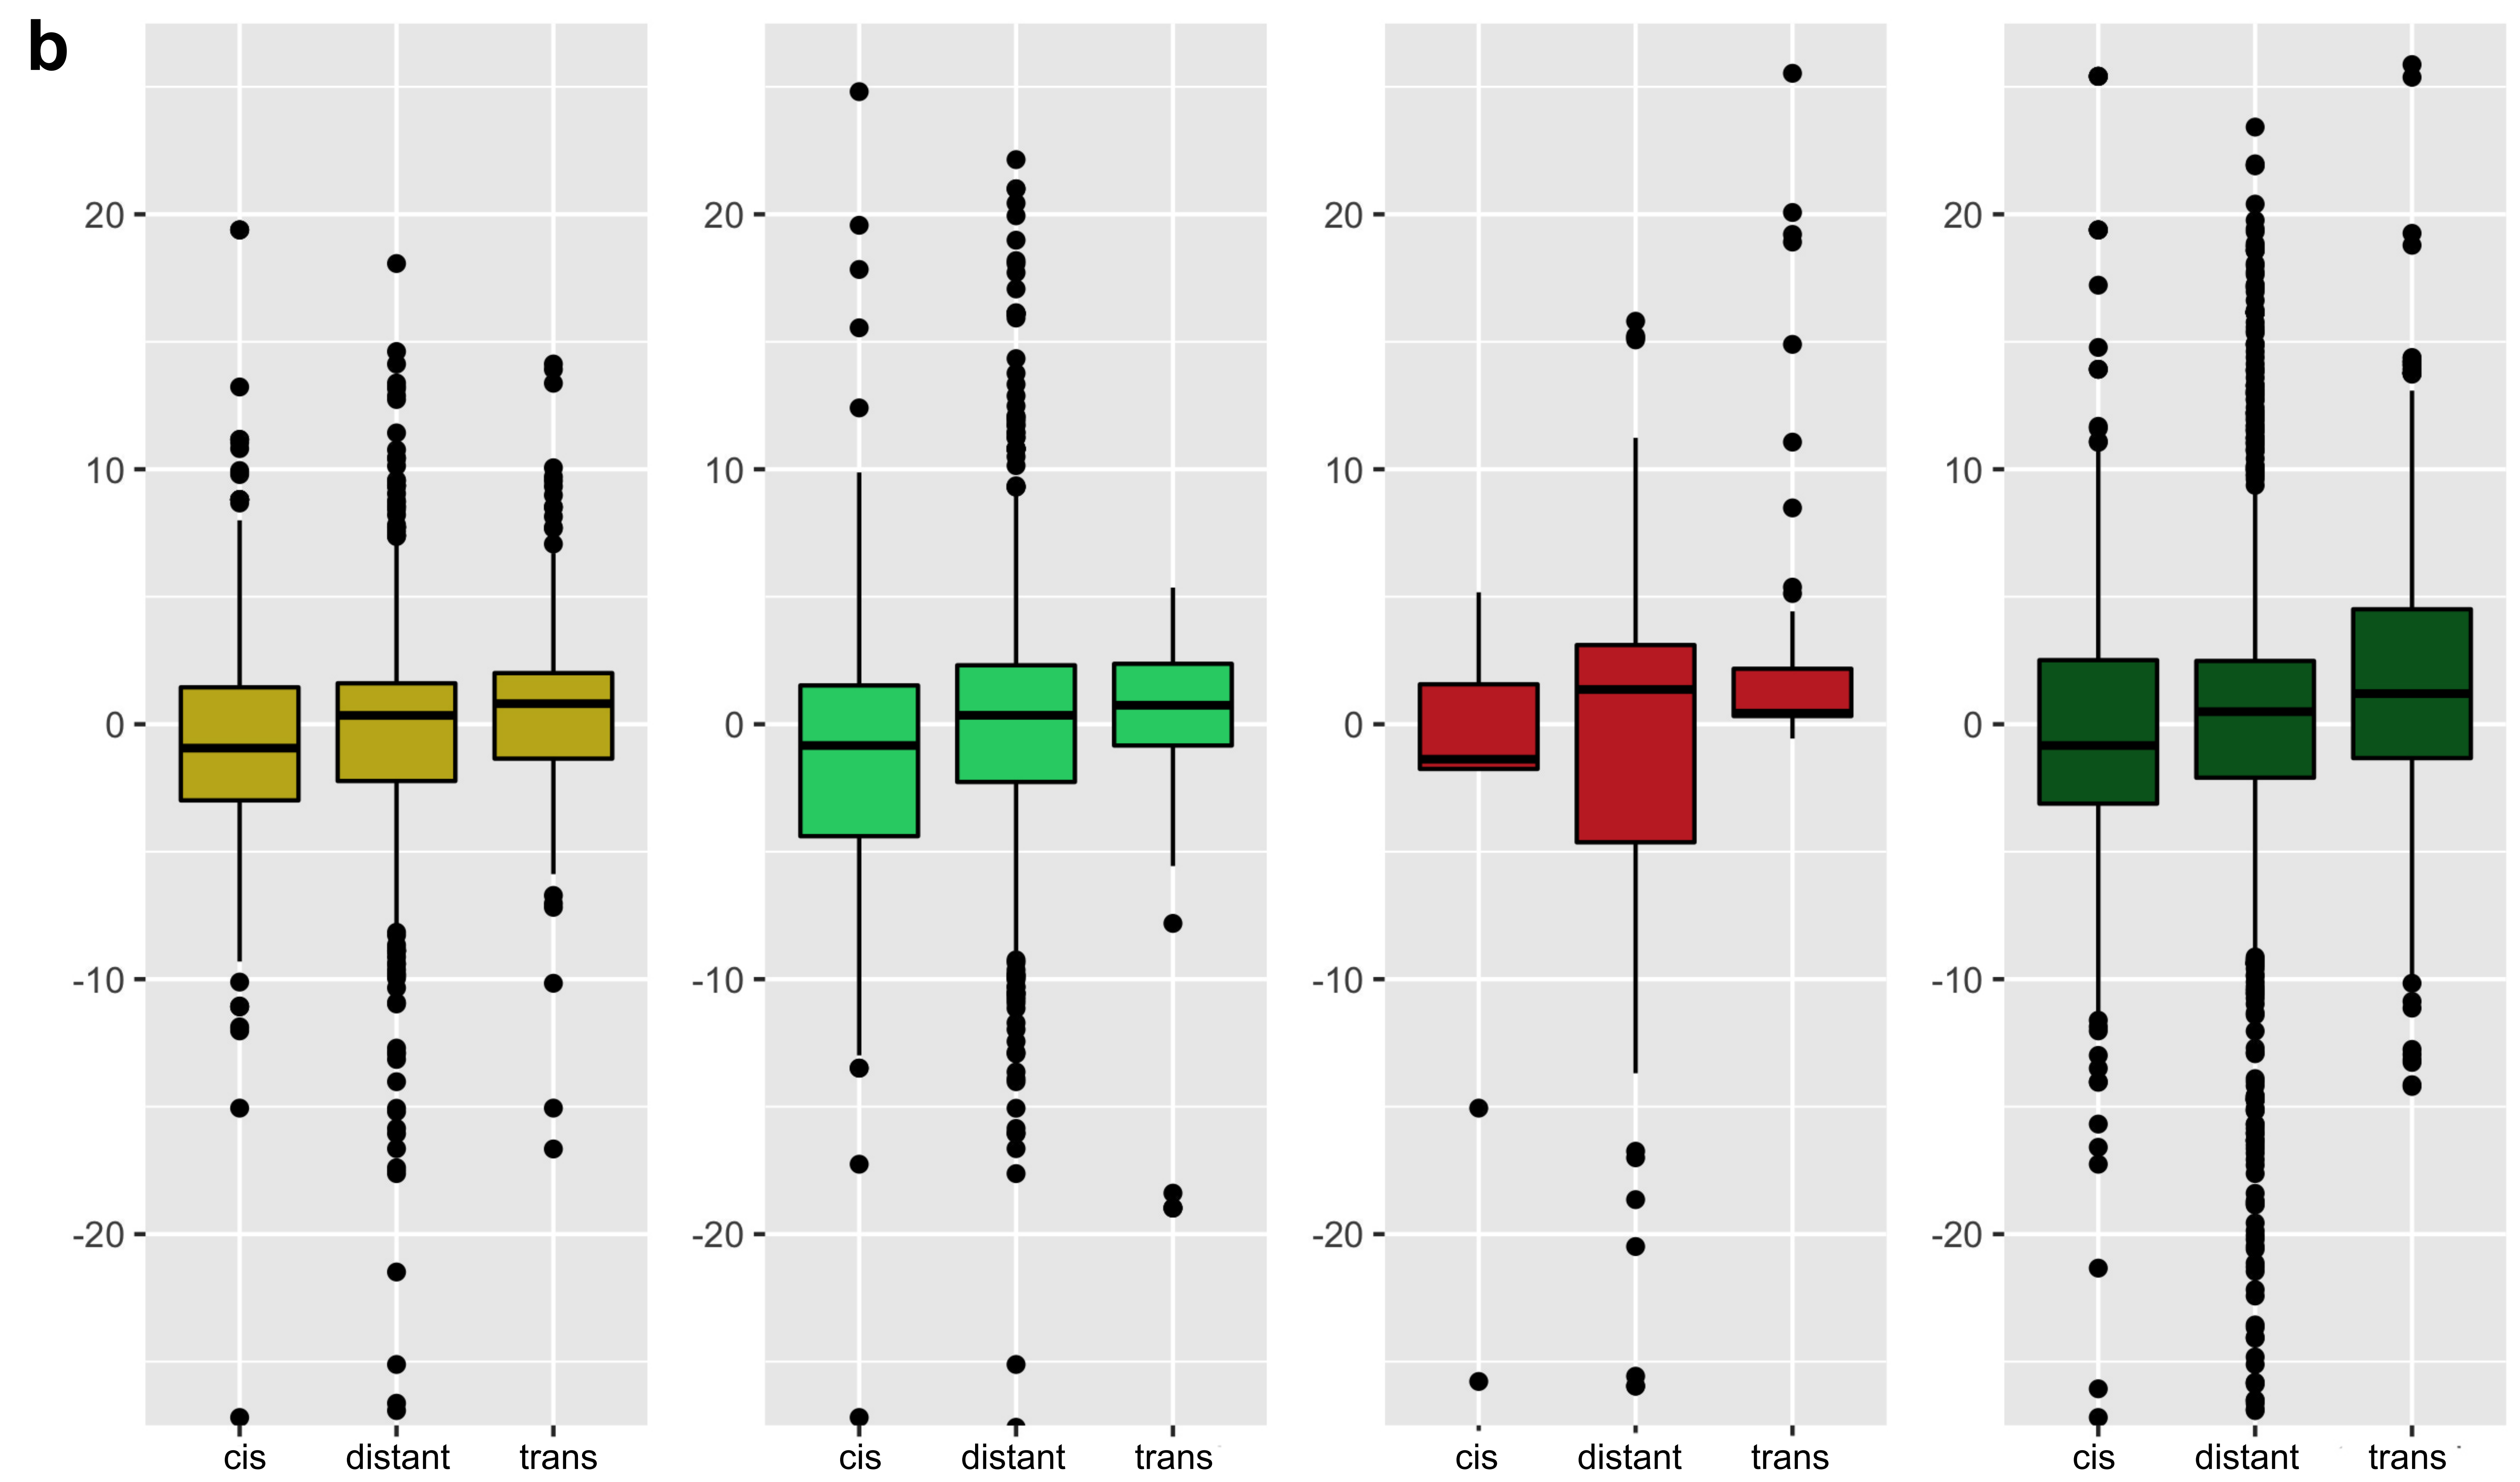

Supplement: TPJ-107-1056-s028.pdf [file TPJ-107-1056-s028.pdf]
